## Autophagy Induced by Palmitic Acid: a Brake in NAFLD Neutrophils

Zhicheng Peng<sup>1,3</sup>, Heyuan Wang<sup>2</sup>, Alan Y. Hsu<sup>3</sup>, Xiliang Du<sup>1</sup>, Yuchen Yang<sup>1</sup>, Baochen Fang<sup>4</sup>, Yunfei Li<sup>1</sup>, Yiwei Zhu<sup>1</sup>, Yuxiang Song<sup>1</sup>, Xiaobing Li<sup>1</sup>, Zhe Wang<sup>1</sup>, Xinwei Li<sup>1</sup>, and Guowen Liu<sup>1\*</sup>

<sup>1</sup>Key Laboratory of Zoonosis, Ministry of Education, College of Veterinary Medicine of Jilin University, Changchun, **China**; <sup>2</sup>The First Hospital of Jilin University, Changchun, **China**; <sup>3</sup>Department of Laboratory Medicine, Boston Children's Hospital, Boston, **USA** and <sup>4</sup>College of Food Science and Engineering, Jilin University, Changchun, **China**

### Key Points:

1 **Vacuolation** and adhesion deficiency of NAFLD neutrophils are associated with autophagy-dependent granule degradation

2 PA inhibits p-PKC $\alpha$ /PKD2 to induce autophagy, which induces the degradation of CD11a, CD11b, CD18 and Rap1 and decreases neutrophil adhesion

### Abstract:

Innate immune suppression and high blood fatty acid levels are the pathological basis of multiple metabolic diseases. Neutrophil vacuolation is an indicator of the immune status of patients, which is associated with autophagy-dependent granule degradation. Vacuolated neutrophils are observed in ethanol toxicity and septicemia patients due to the changes in their blood constituents, but how **about the neutrophils in** nonalcoholic fatty liver disease (NAFLD) patient is unknown. Here, we confirmed that an adhesion deficiency and an increased autophagy level existed in NAFLD neutrophils, and the three neutrophil granule subunits, namely, the azurophil granules, specific granules and gelatinase granules, could be engulfed by autophagosomes for degradation, and these autophagy-triggered granule degradation events were associated with vacuolation in palmitic acid (PA)-treated and NAFLD neutrophils. **Concordantly**, the adhesion-associated molecules CD11a, CD11b, CD18 and Rap1 **on the three granule subunits were degraded during PA induced autophagy. Moreover, the cytosolic CD11a, CD11b, CD18 and Rap1 were targeted by Hsc70 and then delivered to lysosomal-like granules for degradation.** Notably, *in vitro* and *ex vivo*, PA induced autophagy by inhibiting the p-PKC $\alpha$ /PKD2 pathway. Overall, we showed that high blood PA level inhibited the p-PKC $\alpha$ /PKD2 pathway to induce NAFLD neutrophil autophagy, which promoted the degradation of CD11a, CD11b, CD18 and Rap1 and further decreased the **adhesion** of neutrophils, thereby impairing the **neutrophil function** of NAFLD patients. This theory provides a new therapeutic strategy to improve the immune deficiency in NAFLD patients.

## 30 Introduction

31 Neutrophils are the most abundant immune cells in human circulation, ranging from 40 to 70% of our circulating  
32 leukocytes<sup>1</sup>. Generally, neutrophils roll along the vessel walls to conduct immune surveillance. When they sense a  
33 chemotactic cue, the circulating neutrophils roll slowly to adhere to the venular endothelium, extravasate from the  
34 bloodstream and are rapidly recruited to infectious sites to provide the first line of defense against invading  
35 pathogens. Once there, neutrophils phagocytose the pathogen, release their anti-microbial content normally kept  
36 intracellularly in granules, and can release neutrophil extracellular traps to kill and prevent the dissemination of  
37 microbes. There are three neutrophil granules types: azurophil granules (AGs), specific granules (SGs) and  
38 gelatinase granules (GGs), each of which contains a specific array of microbicidal proteins, adhesion molecules,  
39 and various enzymes<sup>2</sup>.

40 In order for neutrophils to efficiently migrate to the site of infection, they express numerous adhesion  
41 molecules. Many  $\beta 2$  integrins<sup>3</sup>, including CD11a/CD18, CD11b/CD18, CD11c/CD18 and CD11d/CD18, are  
42 differentially expressed in neutrophils, either spatially or temporally (located in granules, plasma membranes and  
43 trafficked vesicles). These integrins mediate the firm adhesion between neutrophils and the endothelium by binding  
44 with intercellular adhesion molecule-1 (ICAM) and -2 after neutrophil activation<sup>4-6</sup>. CD11a/CD18 and  
45 CD11b/CD18 are the most abundant and critical  $\beta 2$  integrins during this process<sup>7</sup>. The small GTPase Rap1 is a key  
46  $\beta 2$  integrin activity regulator<sup>8</sup>. Impaired Rap1 or excessive degradation of the  $\beta 2$  integrin subunits ( $\alpha$ -chain or  $\beta$ -  
47 chain) leads to neutrophil adhesion and diapedesis deficiency, inducing a decrease in immune function  
48 characterized by persistent infections<sup>9,10</sup>.

49 Autophagy is a lysosome-dependent degradation process by which complete organelles (mitochondria) or  
50 other cytosolic cargoes are encapsulated and then delivered to lysosomes for degradation<sup>11</sup>. Previously, neutrophil  
51 vacuolation was associated with autophagy-triggered intracellular granule fusion events<sup>12</sup>. Interestingly, lysosome-  
52 associated membrane proteins (LAMPs), the autophagic receptor p62 and proteolytic enzymes were localized on  
53 AGs, SGs, and GGs<sup>2</sup>, suggesting that the three granule subunits of neutrophils are analogous to classic  
54 lysosomes<sup>2,13</sup>. These fusion events are speculated to be associated with p62-mediated autophagy-dependent  
55 granule degradation. Importantly, adhesion-associated molecules, such as  $\beta 2$  integrins and Rap1, were observed on  
56 the three granule subunits, and might be degraded together with granules.

57 Previous studies have demonstrated that ubiquitylated  $\beta 1$  integrins are sorted into early endosomes (EEs) or  
58 multivesicular bodies (MVBs) and then delivered to lysosomes for degradation via the endosomal sorting complex  
59 required for transport (ESCRT) machinery<sup>5,14,15</sup>. Furthermore, Rab GTPases (Rabs) and heat shock cognate 71 kDa

60 protein (Hsc70) have been shown to mediate the fusion of EEs and MVBs with autophagosomes<sup>16-18</sup>, while  
61 integrins were located on Rab-positive EEs and MVBs<sup>19,20</sup>. In addition, molecular chaperone proteins,  $\beta$ 2 integrins  
62 and Rap1 were found on the three lysosome-like granules<sup>2</sup>. Accordingly, we speculated that chaperone-mediated  
63 autophagy (CMA) mediated the degradation of ubiquitylated  $\beta$ 2 integrins and Rap1 in neutrophils and further  
64 influenced neutrophil adhesion and migration.

65 Nonalcoholic fatty liver disease (NAFLD) is a highly prevalent condition which affects 25% of the  
66 population worldwide. NAFLD has been associated with obesity, insulin resistance, type 2 diabetes mellitus  
67 (T2DM), hypertension, hyperlipidemia, and metabolic syndromes. High blood palmitic acid (PA) levels are a major  
68 pathological hallmark of NAFLD and have been shown to be a direct activator of autophagy via the downregulation  
69 of protein kinase C  $\alpha$  subunit (PKC $\alpha$ )<sup>21</sup>. A recent study revealed that knockout or pharmacological inhibition of  
70 PKC $\alpha$  dramatically increased autophagy<sup>22,23</sup>, suggesting that PKC $\alpha$  is a negative regulator of autophagy. We  
71 speculated that in NAFLD patients, when cells are exposed to high blood concentrations of PA, autophagy in  
72 neutrophils could contribute to dampening neutrophil function, thus alleviating inflammatory functions<sup>21</sup>. However,  
73 the mechanism via which PA influences neutrophil autophagy, adhesion and diapedesis in NAFLD patients is  
74 unknown.

75 Here, we identified a mechanism in which the three neutrophil granule subsets of neutrophils were degraded  
76 by autophagy. *Ex vivo* and *in vitro*, PA treatment induced autophagy via the p-PKC $\alpha$ /PKD2 pathway, decreasing the  
77 accumulation of CD11a, CD11b, CD18 and Rap1, and leading to deficiencies in neutrophil adhesion and  
78 diapedesis. In summary, here we present evidence that autophagy plays a bridging role between metabolic diseases,  
79 such as fatty liver disease and deficiency in neutrophil adhesion and diapedesis.

80  
81  
82  
83  
84  
85  
86  
87  
88  
89  
90  
91  
92  
93

94

95

96

## 97 **Materials and methods**

### 98 **Antibodies and reagents**

99 Anti-CD11a mAb (Ab52895), Anti-CD11b mAb (Ab52478), Anti-CD11b mAb (Ab34216), Anti-CD18 mAb  
100 (Ab53009), Anti-CD18 mAb (Ab657), Anti-Hsc70 mAb (Ab2788), Anti-Hsc70 mAb (ab51052), Anti-Rap1 mAb  
101 (Ab175329), Anti-LC3A/B Ab (Ab128025), Anti-SQSTM1/p62 Ab (Ab101266), Anti-SQSTM1/p62 Ab  
102 (Ab56416), Anti-Myeloperoxidase mAb (Ab25989), Anti-Lactoferrin Ab (Ab112968), Anti-PKC $\alpha$  (phospho T638)  
103 mAb (Ab32502) were purchased from Abcam (Cambridge, MA, USA). Anti-ATG5 Ab (NB110-53818),  
104 **BafilomycinA1 (CAS88899-55-2)** were purchased from Novus Biologicals (Centennial, CO, USA). Anti-Ubiquitin  
105 (K-48) mAb (sc-271289), **Anti-PKD2** mAb (sc-374344), Anti- $\beta$ -actin mAb (sc-47778) **were purchased from** Santa  
106 Cruz Biotechnology (Dallas, TX, USA). Anti-rabbit IgG conjugated to 5- nm Gold (G7277), anti-mouse IgG  
107 conjugated to 10- nm Gold (G7777), anti-goat IgG conjugated to 10-nm Gold (G5402), anti-mouse IgG conjugated  
108 to 5-nm Gold (G7527) were purchased from Sigma Aldrich (Shanghai, China). Anti-MMP-9 mAb (MA5-15886),  
109 Anti-CD11a mAb (MA1-19003) were purchased from Thermo Scientific (Waltham, MA, USA). Sodium palmitate  
110 (P9767), Chloroquine phosphate (PHR1258), MG132 (M8699), fMLP (F3506), DFP (D0879) were purchased from  
111 Sigma Aldrich (Shanghai, China). **Human myeloperoxidase ELISA Kit was purchased from Jianglai Biotechnology**  
112 **(Shanghai, China). Cell Fractionation Kit (9038) was purchased from Cell Signaling Technology (Danvers, MA,**  
113 **USA).**

### 114 **Preparation of the PA/BSA Complex Solution**

115 **Sodium palmitate was dissolved in distilled water by heating at 70°C till completely dissolve. Simultaneously, 10%**  
116 **(wt/vol) FFA-free BSA solution was prepared at 55°C. The two solutions were mixed and coupled at 55°C for 10**  
117 **min, made into 50 mM of PA/BSA complex stock solution. Equal volume 5% (wt/vol) FFA-free BSA solution**  
118 **treatment as control.**

### 119 **Human**

120 Venous blood and liver samples (normal and NAFLD) were collected from the First Hospital of Jilin University.  
121 Written informed consent was obtained from all subjects in compliance with the Declaration of Helsinki guidelines  
122 and approved by the ethics committee of the First Hospital of Jilin University (2016-416). Subjects with other  
123 causes of chronic liver disease and renal dysfunction or those receiving potentially hepatotoxic drugs were  
124 excluded.

125 **HL-60**

126 The HL-60 cell line was purchased from Keygentec (Nanjing, China) and was cultured in IMDM medium  
127 supplemented with 20% FBS. The HL-60 cells were differentiated to a neutrophil-like phenotype with a final  
128 concentration of 1.3% DMSO for 6 d.

129 **Preparation of Neutrophils**

130 Normal and NAFLD neutrophils were isolated using commercialized kit purchased from Tbdscience (Tianjin,  
131 China) according to the manufacturer's protocol. Neutrophils were cultured in RPMI 1640 complete medium.  
132 Neutrophil viability was higher than 97% as assessed by trypan blue staining, and purity was higher than 98% as  
133 analyzed by Wright and Giemsa staining.

134 **Neutrophil Viability Assays**

135 Neutrophil were seeded in the 96-wells cell culture plate at a density of  $1.0 \times 10^6$  cells/mL and cultured with RPMI  
136 1640 containing 5% (wt/vol) FFA-free BSA with or without PA (0.25 mM) for various time points. Neutrophil  
137 viability was determined by Cell Counting Kit-8 assay (CK04, Tongren, Japan) according to the manufacturer's  
138 protocol. OD value was measured using a microplate reader at wavelength in the 570 nm, which reflected the  
139 viability of neutrophils.

140 **Transmission Electron Microscopy**

141 Cells were pelleted and fixed with 4% glutaraldehyde in 0.1 M PBS overnight at 4°C. Subsequently, postfixed in  
142 1% osmium tetroxide was followed by dehydration with graded series of ethanol, infiltration and embedding in  
143 SPI-PON 812 resin (SPI Supplies, West Chester, PA, USA). Ultrathin sections with a thickness of 65 nm were cut  
144 using a microtome Leica EM UC7 (Leica Microsystems Company, Wetzlar, Hessen, Germany) and poststained  
145 with 2% uranyl acetate for 10 min and 0.3% lead citrate for 10 min. The ultrathin sections were observed using a  
146 Hitachi H-7650 transmission electron microscope (Hitachi, Kyoto, Japan).

147 **Immunogold Electron Microscopy**

148 Neutrophils were prepared for immunogold electron microscopy as previously described with minor  
149 modifications<sup>24</sup>. Briefly, neutrophils were fixed in 4% paraformaldehyde and 0.5% glutaraldehyde at 4°C for 1.5 h,  
150 washed, scraped and pelleted, sectioned. The sections were soaked in pure water and then blocked in 3% skimmed  
151 milk in PBS for 30 min at room temperature. Subsequently, the sections were labeled with primary antibodies  
152 followed by secondary antibodies conjugated with protein A-gold. The sections were poststained with 2% uranyl  
153 acetate for 10 min before observation with a Hitachi H-7650 transmission electron microscope (Hitachi, Kyoto,  
154 Japan).

155 **Granule quantification**

156 The granules number were performed using the transmission electron microscopy. The sections were chosen by  
157 randomly and then the granule number of each section was quantified based on their morphological characteristics,  
158 such as the size, shape and electron density: AGs are the largest granules (the average diameters approximately 200  
159 nm), with spherical and ellipsoid 2 kind of shape and high electron density; SGs are smaller than AGs, dumbbell  
160 shape and with lower electron density; GGs are the smallest granule in size, round shape and with the lowest  
161 electron density<sup>25,26</sup>. However, due to the thickness of the sections is approximately 90 nm, which is thinner than  
162 the diameter of AGs. So, the density of the AGs we observed much lighter than SGs<sup>26</sup>. In addition, SGs sometimes  
163 show the round shape due to the different cut angle or cut ways.

#### 164 **Marker Assays**

165 Granules can be distinguished on the basis of their morphological characteristics, such as size, shape and electron  
166 density: AGs are large granules with high electron density; SGs are smaller than AGs and have lower electron  
167 densities; and GGs are the smallest granules in size and have the lowest electron densities<sup>27</sup>. In addition, the three  
168 granule subunits are identifiable by their marker proteins: myeloperoxidase (MPO) is an AG marker, lactoferrin is  
169 an SG marker, and gelatinase (MMP-9) is a GG marker<sup>28-30</sup>. These marker molecules were labeled using  
170 immunogold electron microscopy.

#### 171 **Adhesion Assay**

172 Human umbilical vein endothelial cells (HUVECs, KG060) were purchased from Keygentec (Nanjing, China) and  
173 were cultured in RPMI 1640 medium supplemented with 10% FBS. The monolayer of HUVECs were plated 12h  
174 ahead in 96-well plates as substrates. Then, the neutrophils or HL-60 cells were collected after different treatments.  
175 Firstly, the cells were labeled with calcein AM (5  $\mu$ M) for 30 min at 37°C. Subsequently, the labeled cells were  
176 washed, resuspended at  $5.0 \times 10^6$  cells/mL, and then were activated with 1  $\mu$ M fMLP for 30 min, and then added to  
177 the HUVEC monolayer. The plates were incubated at 37°C for 30-60 min. Notably, for ex vivo experiments,  
178 neutrophils from NAFLD patients or normal subjects were incubated with their own sera at this step. At the end of  
179 the incubation period, nonadherent cells were removed with cold RPMI medium containing 1% FBS. The plate was  
180 scanned with a Tecan Infinite 200 PRO multifunctional microplate reader (TECAN, Männedorf, Switzerland), and  
181 the fluorescence of the adherent cells was measured by Nikon fluorescence microscope (Nikon, Tokyo, Japan).

#### 182 **Immunoprecipitation Assay**

183 Neutrophils were harvested and incubated with cold 1×PBS containing 2 mM DFP on ice for 15 min. Cytosolic  
184 fraction of neutrophils was performed using a Cell Fractionation Kit (Danvers, MA, USA). Immunoprecipitated  
185 was performed from cytosolic fraction using a Pierce Crosslink Immunoprecipitation Kit (Thermo Scientific, MA,  
186 USA). 1 mg of cytosolic fraction was precleared with 80  $\mu$ L of the control agarose resin slurry for 1.5 h at 4°C. The

187 primary antibodies were cross-linked to protein A/G plus agarose. The precleared lysate was added to the primary  
188 antibody-crosslinked resin in the column overnight at 4°C. The unbound proteins were washed away with IP  
189 lysis/wash buffer. Then, the immunoprecipitated proteins were eluted. The eluate concentrations were determined  
190 using the BCA Protein Assay Kit (Pierce, IL, USA). The protein complexes were analyzed by SDS-PAGE, and the  
191 gel was stained with Coomassie blue.

#### 192 **Generation and differentiation of the ATG5, p62 and Hsc70 knockdown and PRKD2 overexpression HL-60** 193 **cell lines**

194 The lentiviral vectors for ATG5 knockdown (LV-GFP-shATG5), p62 knockdown (LV-GFP-shp62) and for Hsc70  
195 knockdown (LV-GFP-shHsc70) were purchased from GeneChem (Genechem, Shanghai, China). The lentiviral  
196 vector for PRKD2 overexpression (LV-GFP-PRKD2) was constructed by GeneChem (Genechem, Shanghai,  
197 China). HL-60 cells were infected with lentiviral vectors at a MOI of 25 in the presence of 5 µg/mL polybrene. The  
198 HL-60 cells were differentiated to a neutrophil-like phenotype with a final concentration of 1.3% DMSO for 6 d.  
199 Stably knocking down or overexpressing cell lines were selected with puromycin (5 µg/ml) and identified by qRT-  
200 PCR, western blotting and immunofluorescence. The wild-type and the relevant empty lentivectors cells were used  
201 as negative control.

#### 202 **Protein Complex Identification by Shotgun Analysis**

203 Endogenous CD11a, CD11b, CD18, Rap1, and Hsc70 were enriched using immunoprecipitation assay.  
204 Approximately 30 µg of IP complexes of CD11a, CD11b, CD18, Rap1, and Hsc70 was performed by Shotgun  
205 Analysis as previously described<sup>31</sup>. MS/MS spectra were searched using MASCOT engine (version 2.2, Matrix  
206 Science) embedded into Proteome Discoverer 1.4<sup>32</sup> against the Uniprot Human database (156914 sequences,  
207 downloaded on March 2, 2017). For protein identification, the following parameters were selected: Peptide mass  
208 tolerance: 20 ppm, MS/MS tolerance: 6 ppm, Enzyme: Trypsin, Max Missed Cleavages: 2, Fixed modifications:  
209 Carbamidomethyl (C), Dynamical modifications: Oxidation (M) and GlyGly (K), peptides FDR ≤ 0.01, protein  
210 FDR ≤ 0.01, Filter by score ≥ 20.

#### 211 **Isobaric Tag for Relative and Absolute Quantitation (iTRAQ) Proteomic Assay**

212 Neutrophils were treated with PA (0.25 mM) for 3 h, and the untreated group served as control. The samples were  
213 lysed with SDT buffer (4%SDS, 100mM Tris-HCl, 1mM DTT, pH7.6) completely and centrifuged at 14,000×g at  
214 room temperature for 5 min. Then, the supernatants were collected, and the protein concentrations were determined  
215 using the BCA Protein Assay Kit (Pierce, IL, USA). Twenty micrograms of protein were separated on a 12.5%  
216 SDS-PAGE gel (with a constant current of 14 mA for 90 min) to evaluate protein quality. Protein bands were  
217 visualized with Coomassie blue R-250 staining. The process of Trypsin Digestion, iTRAQ Labeling, Peptide

218 Fractionation and LC-MS/MS analysis were performed as previously described<sup>33</sup>. MS/MS spectra were searched  
219 using MASCOT engine (version 2.2, Matrix Science) embedded into Proteome Discoverer 1.4<sup>32</sup> against the Uniprot  
220 Human database (156639 sequences, downloaded on January 5, 2017). For protein identification and quantification,  
221 the parameters were selected as previously described<sup>33</sup>. The median protein ratio should be 1 after the  
222 normalization.

### 223 **Quantification and statistical analysis**

224 *Statistical analysis was carried out using PRISM 6 (GraphPad). The unpaired t- test (when comparing 2 groups),*  
225 *One-way ANOVA test (when comparing with a single group), and two-way ANOVA (when comparing multiple*  
226 *factors between two groups) were used in this study as indicated in the figure legends. Individual P values are*  
227 *indicated in the figures, with no data points excluded from statistical analysis.*

228

229

230

231

232

233

234

235

236

237

238

239

240

241

242

243

244

245

246

247



248

249

250

251

252

253 **Table 1.** The anthropometric, biochemical parameters and clinical characteristics of normal individuals and NAFLD  
254 patients

| Parameter                              | Normal (n=12) | NAFLD (n=12) | P-value |
|----------------------------------------|---------------|--------------|---------|
| Gender (female)                        | 6 (50.0%)     | 6 (50.0%)    |         |
| Age (years)                            | 36±15         | 46±10        | 0.007   |
| Body weight (kg)                       | 67.1          | 77.7         | 0.020   |
| Height (m)                             | 172           | 169          | 0.210   |
| Non-esterified fatty acids (mmol/L)    | 0.35±0.042    | 0.53±0.028   | 0.002   |
| Fasting palmitic acid (mmol/L)         | 0.094±0.008   | 0.19±0.007   | 0.000   |
| BMI (kg/m <sup>2</sup> )               | 22.54±0.34    | 27.02±0.86   | 0.000   |
| Fasting glucose (mmol/L)               | 5.07±0.20     | 5.37±0.18    | 0.271   |
| TC (mmol/L)                            | 4.82±0.18     | 5.14±0.36    | 0.437   |
| TG (mmol/L)                            | 1.37±0.11     | 1.89±0.29    | 0.110   |
| HDL cholesterol (mmol/L)               | 1.39±0.13     | 1.11±0.08    | 0.072   |
| LDL cholesterol (mmol/L)               | 2.91±0.27     | 3.14±0.25    | 0.550   |
| AST (U/L)                              | 21.83±1.13    | 30.75±5.55   | 0.130   |
| ALT (U/L)                              | 25.25±3.36    | 33.17±10.48  | 0.479   |
| AST/ALT                                | 0.99±0.11     | 1.15±0.12    | 0.323   |
| White blood cells (10 <sup>9</sup> /L) | 6.02±0.54     | 6.86±0.50    | 0.267   |
| Neutrophils (10 <sup>9</sup> /L)       | 3.53±0.32     | 4.18±0.43    | 0.234   |
| Neutrophils/White blood cells (%)      | 0.58±0.02     | 0.60±0.02    | 0.395   |
| Lymphocytes (10 <sup>9</sup> /L)       | 2.09±0.19     | 2.11±0.12    | 0.930   |
| Monocytes (10 <sup>9</sup> /L)         | 0.31±0.06     | 0.41±0.06    | 0.194   |

255 BMI, body mass index; TC, total cholesterol; TG, Triglycerides; HDL, high-density lipoprotein cholesterol; LDL,  
256 low density lipoprotein cholesterol; AST, aspartate aminotransferase; ALT, alanine aminotransferase.

257

## 258 Results

### 259 Autophagy-dependent Vacuolation and Adhesion Deficiency Existed in NAFLD Neutrophils

260 Neutrophil vacuolation is an indicator of the immune status of patients<sup>34</sup>. An increase in vacuolated neutrophils are  
261 commonly observed in ethanol toxicity and septicemia patients<sup>35,36</sup>, which have been associated with autophagy-  
262 triggered granule degradation<sup>12,37</sup>. Whether vacuolization of neutrophils also contribute in NAFLD patients is  
263 currently unknown. To investigate the immune status of NAFLD patients, neutrophils were obtained from normal  
264 individuals (n=12) and NAFLD patients (n=12). NAFLD patients were diagnosed by liver biopsy and hepatic HE  
265 staining (Figure S1). The clinical parameters of the subjects are listed in Table 1. Four consecutive stages of  
266 autophagic vacuoles in NAFLD neutrophils were defined, based on the degree of degradation of cytosolic portions

267 or granules: early autophagic vacuoles (AVi), degradative autophagic vacuoles (AVd), glycogen vacuoles, and  
268 vacuoles. The four stages of autophagic vacuoles were observed in NAFLD neutrophils, with increased total  
269 vacuole number and autophagic vacuole to neutrophil area ratio, compared to normal neutrophils (Figure 1A and  
270 Figure 1B). The lipidation level of LC3B was also markedly increased and the accumulation of p62 decreased in  
271 NAFLD neutrophils (Figure 1C). These results indicated that the autophagic process was more prominent in  
272 NAFLD neutrophils. Interestingly, the number of granules in NAFLD neutrophils was significantly reduced (Figure  
273 1D). In the AVi and AVd stages, a significant number of granules were engulfed by autophagic vacuoles (Figure  
274 1A). To evaluate whether granule-associated adhesion molecules were degraded with granules in NAFLD  
275 neutrophils, the total protein levels and the surface expression of CD11a, CD11b CD18 and Rap1 were assessed by  
276 immunoblotting and by flow cytometry, respectively. As expected, the total protein level and surface expression of  
277 CD11a, CD11b and CD18 were all significantly lower in patients compared to the healthy controls (Figure 1C,  
278 Figure 1E and Figure S2). The reduced expression of the adhesion molecules correlated with an impaired level of  
279 adhesion of NAFLD neutrophils in vitro compared to healthy neutrophils (Figure 1F). These results showed that  
280 NAFLD neutrophils had an increased number of autophagic vacuoles correlated to a decreased adhesion deficiency,  
281 suggesting that autophagy inhibited the motility of neutrophils in NAFLD patients.

## 282 PA Enhanced Autophagy and Degraded the Granules in Neutrophils

283 PA, a major pathological hallmark of NAFLD, can induce autophagy in mouse embryonic fibroblasts<sup>21</sup>. We  
284 investigated the effect of 0.25 mM PA, a pathological concentration in NAFLD, on autophagy in neutrophils.  
285 Immunoblotting results showed that neutrophil autophagy was induced between 4 and 8 hours of PA treatment  
286 (Figure S3). PA also strongly triggered neutrophil vacuolation (Figure?). Consistent with our *ex vivo* findings, the  
287 four stages of autophagic vacuoles were observed in PA-treated neutrophils (Figure 2A). The number of autophagic  
288 vacuoles and the ratio of autophagic vacuole area to neutrophil area were significantly higher in PA-treated  
289 neutrophils than in control neutrophils (Figure 2B). The lipidation levels of LC3B were significantly higher in PA-  
290 treated neutrophils, while p62 were significantly reduced (Figure 2C). Furthermore, the number of granules  
291 significantly decreased in PA-treated neutrophils (Figure 2D). To make sure autophagy mediates the decrease of  
292 granules triggered by PA, Rapamycin (RAP) was used to activate autophagy. Expectedly, the number of granules  
293 decreased in RAP treated neutrophils (Figure 2D). Moreover, when autophagy induced by PA was blocked by  
294 bafilomycin A (BafA1) or hydroxychloroquine sulfate (CQ), the number of granules significantly increased (Figure  
295 2D). However, PA induced neutrophil degranulation would also affect granule numbers (Figure S4A), To exclude  
296 this, neutrophils were stimulated with fMLP to further induce degranulation upon PA treatment. No difference was

297 observed in granule numbers compared to the unstimulated groups (Figure S4B). These results suggests that PA  
298 induced autophagy plays an important role in neutrophil granule homeostasis. ATG5 knockdown lentivirus were  
299 infected the neutrophil-like differentiated (dHL-60) cells to deficient autophagy to further reiterate the effect of PA-  
300 induced autophagy. PA-treated ATG5-KD dHL-60 cells showed a similar recovery of granule number (Figure 2E).  
301 These results indicate that PA strongly enhances neutrophil autophagy and vacuolation, which is associated with  
302 granule degradation.  
303 Organelles delivery to lysosomes for degradation is dependent on the autophagic receptor p62<sup>38</sup>. To investigate  
304 whether the decrease in granule levels was associated with p62-mediated granule degradation, immunogold  
305 electron microscopy was performed. The p62 electron-dense gold particles were predominantly localized on the  
306 AVi and AVd, but rarely on the vacuoles in PA-treated neutrophils (Figure 2F). This data motivated us to speculate  
307 that p62 might mediate the degradation of granules. AGs, SGs and GGs can be distinguished according to their size  
308 and electron density<sup>27</sup>. In addition, myeloperoxidase (MPO), lactoferrin and gelatinase (MMP-9) are markers of  
309 AG, SG, and GG, respectively<sup>28-30</sup>. To investigate whether all three granule types could be degraded by autophagy,  
310 double-labeling studies and morphological analysis were performed in control and PA-treated neutrophils. While  
311 p62 and MPO were colocalized on the large and highly electron-dense AGs (Figure 2G); p62 and lactoferrin were  
312 colocalized on the smaller and less electron-dense SGs (Figure 2H); and p62 and MMP-9 were colocalized on the  
313 smallest and least electron-dense GGs (Figure 2I). The AGs, SGs and GGs were observed could be engulfed by  
314 autophagic vacuoles (Figure 2G, Figure 2H and Figure 2I) Expectedly, knockdown of p62 attenuated the PA-  
315 induced decreased granule number in dHL-60 cells (Figure 2J). Altogether, this showed that p62 mediated the  
316 degradation of the AGs, SGs and GGs by autophagy, thereby causing the decrease in granule number and  
317 neutrophil vacuolation.

### 318 PA-induced Autophagy Decreased Neutrophil Adhesion

319 In control neutrophils, CD11a, CD11b, CD18 and Rap1 electron-dense gold particles were present on the granules,  
320 secretory vesicles, and the plasma membrane as well as in the cytoplasmic matrix (Figure 3A). In PA-treated  
321 neutrophils, the CD11a, CD11b, CD18 and Rap1 gold particles were primarily present on AVi and AVd, but  
322 sparsely on vacuoles (Figure 3A). AGs, SGs and GGs were distributed with Rap1 in neutrophils<sup>2</sup>. We next  
323 investigated whether CD11a, CD11b and CD18 were also detected on AGs, SGs and GGs using double-labeling  
324 (CD11a, CD11b and CD18 colocalized with MPO, lactoferrin and MMP-9, respectively) and the morphological  
325 analysis of the three granule subtypes. We found that the gold particles corresponding to CD11a, CD11b and CD18  
326 were all present on AGs (Figure 3B), SGs (Figure 3C) and GGs (Figure 3D), and few located on vacuoles (Figure

327 **3B, Figure 3C and Figure 3D). These results suggested that the degradation of the three granules could possibly be**  
328 **mediated by autophagy.** Consistent with this observation, the protein levels of CD11a, CD11b, CD18 and Rap1  
329 were significantly lower in PA-treated neutrophils than in control neutrophils (Figure 3E). Furthermore, surface  
330 expression of CD11a, CD11b, and CD18 were greatly decreased in PA-treated neutrophils (Figure 3F and Figure  
331 S5). As decreased surface levels of CD11a, CD11b, and CD18 influence neutrophil adhesion, we measured  
332 neutrophil's adhesion with or without PA n. Cells were seeded on collagen-coated culture plates. Control  
333 neutrophils adhered to the plates evenly and tightly (Figure S6), while PA-treated PMN adhered to the plates  
334 loosely, and cell lumps were observed floating in the medium (Figure S6). Quantification of the cell attachment  
335 showed that the adhesion of PA-treated neutrophils was significantly impaired compared to control neutrophils  
336 (Figure 3G). **This was not due to a cytotoxic effect of PA on neutrophils at the concentration used in our**  
337 **experiments (0.25 mM) (Figure S7).** Taken together, the results showed that PA induced autophagy triggered AG,  
338 SG and GG degradation and was accompanied by the degradation of CD11a, CD11b, CD18, and Rap1 in  
339 neutrophils, significantly decreasing neutrophil adhesion.

#### 340 **Hsc70-Dependent CD11a, CD11b, CD18 and Rap1 Degradation by Autophagy Reduced Neutrophil Adhesion**

341 Ubiquitination is a prerequisite for protein degradation by autophagy<sup>39</sup>. We initially investigated whether  
342 CD11a, CD11b, CD18 and Rap1 could be ubiquitinated. The data showed that polyubiquitin was reciprocally  
343 coimmunoprecipitated with CD11a, CD11b, CD18 and Rap1 in neutrophils, which suggested that the IP complexes  
344 of CD11a, CD11b, CD18 and Rap1 could be polyubiquitinated (Figure 4A). The accumulation of CD11a, CD11b,  
345 CD18 and Rap1 was greatly decreased when autophagy was induced by PA, while protein levels were increased  
346 significantly when autophagy was blocked by BafA1 or CQ in PA-treated neutrophils (Figure 4B and Figure S8A).  
347 Similarly, inhibition of PA-induced autophagy increased neutrophil adhesion (Figure 4C and Figure S8B). To  
348 further confirm that PA-induced autophagy decreased neutrophil adhesion by promoting CD11a, CD11b, CD18,  
349 and Rap1 degradation, HL-60 cells were transduced with shRNAs specific for ATG5 (Figure 4D, Figure S9A,  
350 Figure S9B and Figure S9C). ATG5 knockdown attenuated PA-induced vacuolation (Figure S9A and Figure S9B),  
351 reduced the degradation of CD11a, CD11b, CD18 and Rap1 (Figure 4D and Figure S9C) and partially restored cell  
352 adhesion (Figure 4E and Figure S9D).

353 To identify the molecules involved in the degradation of the adhesion molecules and Rap1, proteins present in  
354 IP complexes of CD11a, CD11b, CD18 and Rap1 were identified by a shotgun analysis. A total of 415 proteins  
355 interacted with CD11a (Table S1); 217 proteins were identified in CD11b complexes (Table S2); 236 proteins were  
356 with CD18 (Table S3); and 399 proteins with Rap1 (Table S4). Interestingly, neither ubiquitinated peptides of

357 CD11a, CD11b, CD18 and Rap1 nor peptides of p62 were detected. This suggested that CD11a, CD11b, CD18 and  
358 Rap1 were not directly ubiquitinated and recognized by p62. Unexpectedly, a total of 27 common proteins  
359 interacted with CD11a, CD11b, CD18 and Rap1 (Table S5), including the molecular chaperone Hsc70. Hsc70 is  
360 known to target and then deliver cytosolic proteins to lysosomes for degradation via the chaperone molecular  
361 autophagy (CMA) pathway<sup>40</sup>. We confirmed the interaction as Hsc70 was reciprocally coimmunoprecipitated with  
362 CD11a, CD11b, CD18 and Rap1 (Figure 4F). In addition, immunogold electron microscopy results showed that  
363 Hsc70 gold particles were present on the granules in control neutrophils (Figure S10). However, Hsc70  
364 immunogold signal was observed on AVi and AVd but rarely present on the vacuoles in PA-treated neutrophils  
365 (Figure S10). This suggested that Hsc70 was targeting the adhesion molecules and Rap1 for lysosomal degradation.

366 The three granule subunits of neutrophils are analogous to classic lysosomes as they contain LAMPs, p62 and  
367 proteolytic enzymes<sup>41,42</sup>. However, AGs are viewed as turnover factories of ubiquitinated protein aggregates in  
368 neutrophils<sup>43</sup>. As a molecular chaperone, Hsc70 can target and deliver the cytosolic proteins to lysosomes for  
369 degradation by CMA<sup>40</sup>. To further investigate whether Hsc70 is involved in the delivery of CD11a, CD11b, CD18  
370 and Rap1 to the lysosome-like granules during PA-induced autophagy, colocalization analysis of Hsc70 with MPO,  
371 lactoferrin and MMP-9, as well as the morphological analysis of the three granule subunits were performed in  
372 neutrophils. Hsc70 colocalized with MPO on AGs, lactoferrin on SGs, and MMP-9 on GGs (Figure 4G). This was  
373 consistent with prior results showing Hsc70 distribution on the types of granule<sup>44</sup>. To confirm the role of Hsc70 in  
374 the degradation of CD11a, CD11b, CD18 and Rap1, HL-60 cells were transduced with a lentivirus that produced  
375 shRNAs specific for Hsc70. Hsc70 knockdown attenuated the PA-induced degradation of CD11a, CD11b, CD18  
376 and Rap1 (Figure 4H and Figure S11A) and adhesion of HL-60 cells was partially restored (Figure 4I and Figure  
377 S11B). These findings indicated that CD11a, CD11b, CD18 and Rap1 were partially targeted by Hsc70, delivered  
378 to granules and degraded by autophagy following PA treatment. However, the mechanism of Hsc70 shuttles the  
379 CD11a, CD11b, CD18 and Rap1 to the three lysosomal like granules warrant further investigation.

### 380 PA Induced Autophagy via the p-PKC $\alpha$ /PKD2 Pathway and Further Decreased Neutrophil Adhesion

381 To elucidate the mechanisms underlying the autophagy induced by PA, quantitative proteomic analysis of control  
382 and PA-treated neutrophils was performed using iTRAQ. A total of 296 differentially expressed proteins were  
383 identified, of which 46 were upregulated proteins (P/C > 1.2, P < 0.05) and 250 were downregulated proteins (P/C  
384 < 0.833, P < 0.05) (Table S6). Intriguingly, some upregulated proteins were involved in the ubiquitin-dependent  
385 autophagic catabolic processes (Accession: A0A0U1ZID9; Q15819; P15374) and in proteolysis (B4DPA4;  
386 Q4KMP7; E5RGM3). Many downregulated proteins were involved in chemotaxis (Q9BZL6; H3BMK2; P01137),

387 endocytosis (A0A075B6N7; A0A087WXP0), polarity (F5GZG1), migration (P01137; Q9BZL6) and adhesion  
388 (B4DNT6; P05556; Q9BZL6). Notably, the iTRAQ results showed that a downstream effector of PKC $\alpha$ , namely,  
389 serine/threonine protein kinase D2 (PKD2, Accession: Q9BZL6), was significantly downregulated. Consistent with  
390 the iTRAQ results, immunoblotting results showed that the expression of p-PKC $\alpha$  and PKD2 were significantly  
391 decreased in PA-treated neutrophils (Figure 5A) and in NAFLD neutrophils (Figure 5B). These results indicated  
392 that PA inhibited the p-PKC $\alpha$ /PKD2 pathway. Knockout or pharmacological inhibition of PKC $\alpha$  dramatically  
393 increased autophagy<sup>22,23</sup>. To investigate whether PA induced neutrophil autophagy and vacuolation via inhibiting  
394 the p-PKC $\alpha$ /PKD2 pathway and further decreased neutrophil adhesion, neutrophils were treated with the p-  
395 PKC $\alpha$ /PKD2 inhibitor GO6983 with or without PA. PA or GO6983 significantly inhibited the p-PKC $\alpha$ /PKD2  
396 pathway and upregulated the lipidation levels of LC3B, downregulated p62 accumulation (Figure 5D), and  
397 increased neutrophil vacuolation (Figure 5C). Treatments also decreased CD11a, CD11b, CD18 and Rap1 protein  
398 levels and impaired neutrophil adhesion (Figure 5E and Figure 5F). Transduction of dHL-60 cells with a PRKD2-  
399 overexpressing lentivirus attenuated the effect of PA on autophagy (Figure 5G, Figure 5H and Figure 5I),  
400 vacuolation (Figure 5G and Figure 5H), and adhesion (Figure 5J and Figure 5K), as evidenced by the significantly  
401 decreased lipidation of LC3B, increased accumulation of p62, CD11a, CD11b, CD18 and Rap1 (Figure 5I), and  
402 improved adhesion of dHL-60 cells (Figure 5J and Figure 5K). Taken together, these findings indicated that PA  
403 inhibited p-PKC $\alpha$ /PKD2 pathway, leading to autophagy and vacuolation, and the subsequent decreased expression  
404 of CD11a, CD11b, CD18 and Rap1 and neutrophil adhesion.

## 405 Discussion

406 Integrins are required for cancer cell matrix adhesion and firm adhesion of neutrophils<sup>45,46</sup>. Autophagy  
407 decreases cancer cell matrix adhesion and facilitates tumor metastasis by degrading  $\beta$ 1 integrins<sup>47</sup>. However, it is  
408 unknown whether autophagy decreases the firm adhesion of neutrophils by degrading  $\beta$ 2 integrins. In metabolic  
409 diseases, neutrophils are exposed to abnormal metabolite levels, such as high blood levels of fatty acids, which  
410 exhibit lipotoxicity and can impair neutrophil immune function. In this study, we found that the three neutrophil  
411 granule types, namely, AGs, SGs and GGs, could be engulfed by autophagosomes for degradation in NAFLD  
412 neutrophils. Furthermore, CD11a, CD11b, CD18 and Rap1 in the neutrophils were targeted by Hsc70 and degraded  
413 via autophagy. Consequently, neutrophil adhesion was significantly decreased. Notably, we found that PA inhibited  
414 the p-PKC $\alpha$ /PKD2 pathway to induce autophagy. In neutrophils, autophagic vacuoles exhibit morphological  
415 diversity, and the classification of these vacuoles is not well standardized. Many appellations, such as phagocytic  
416 vacuole<sup>48</sup>, glycogen autophagosome<sup>49</sup> and vacuole<sup>50</sup>, have been used to describe neutrophil autophagic vacuoles.

417 We first divided the neutrophil autophagic vacuoles according to four consecutive stages, namely, AVi, AVd,  
418 glycogen vacuole and vacuole, depending on the degree of degradation of the engulfed granules or other cytosolic  
419 cargoes. **The autophagy receptor p62 mediates the degradation of the damaged mitochondria in energy cells<sup>51</sup>.** We  
420 found that most AGs, SGs and GGs colocalized with p62 and MPO, lactoferrin and MMP-9, respectively, were  
421 located **on** the AVi and AVd of neutrophil autophagic vacuoles. Little to no signal was observed on the glycogen  
422 vacuole and vacuole stages, which indicated that **p62 might deliver the damaged AGs, SGs and GGs to lysosomes**  
423 **for degradation** via autophagy. Interestingly, granules are **also considered as the lysosomes of neutrophils<sup>52,53</sup>.**  
424 **Damaged lysosomes can be eliminated through autophagy<sup>54</sup>.** Moreover, lysosomes can fusion with  
425 **autophagosomes, which process further damaged lysosomes, as well the lysosomal proteins are released into the**  
426 **cytoplasm. Degranulation is the process of regulated exocytosis of these lysosome-like granules. Autophagy**  
427 **deficiency inhibits degranulation<sup>55</sup>.** Whether the fusion of the granules with autophagosomes plays a role in the  
428 **regulation of degranulation warrant further investigation.**

429 This continuous autophagic flux contributed to neutrophil vacuolation. As mentioned above, the immunity of  
430 patients with severe vacuolated neutrophils is decreased<sup>34</sup>. Interestingly, we found that autophagic vacuoles also  
431 existed in NAFLD neutrophils, hinting at a reduced immunity of NAFLD patients. Interestingly, CD11a, CD11b  
432 and CD18 were all observed on the AGs, SGs and GGs. These  $\beta 2$  integrins protein levels were lowered  
433 concomitantly with the number of the three granule types. The decreased protein level of the adhesion molecules  
434 and the upstream signaling molecule Rap1 was dependent on autophagy, and impaired neutrophil adhesion. Rap1, a  
435  $\beta 2$  integrin activity regulator<sup>8</sup>. These findings suggested that autophagy decreases neutrophil adhesion by both  
436 degrading CD11a, CD11b and CD18 and reducing the activity of these proteins by facilitating Rap1 degradation.

437 **Although we confirmed that the CD11a, CD11b, CD18 and Rap1 could be degraded through autophagy and**  
438 **autophagy plays an important role in neutrophil adhesion, we also showed that the proteasome inhibitor MG132**  
439 **rescued CD11a, CD11b, CD18 and Rap1 protein levels as well as a restored cell adhesion. However, the inhibition**  
440 **of autophagy had a more profound effect on adhesion than the inhibition of the proteasome pathway, supporting a**  
441 **more important role of autophagy in the regulation of integrins in neutrophils adhesion.** Ubiquitination is a  
442 prerequisite for autophagy-dependent protein degradation<sup>56</sup>. Multiple pathways are involved in the direct<sup>56</sup> and  
443 indirect ubiquitination<sup>57</sup> of cell surface proteins. To investigate the ubiquitination of CD11a, CD11b, CD18 and  
444 Rap1, four IP complexes were enriched from neutrophils and identified by a shotgun proteomic approach.  
445 Surprisingly, no ubiquitinated peptides of CD11a, CD11b, CD18 and Rap1 were detected, possibly because the  
446 ubiquitinated protein levels were too low or the proteins could not be ubiquitinated directly. Moreover,

447 polyubiquitin proteins (P0CG48, [Table S1](#) and [Table S2](#) and [Table S4](#)) and E3 ubiquitin-protein ligases (Q76N89,  
448 O76064, Q86UK7, [Table S1](#); Q86Y13, H7C3Z1 [Table S3](#); Q9NQC1, A0A096LP02, Q96T88, [Table S4](#)) were  
449 identified in the IP complexes, suggesting that these four proteins might form polyubiquitin-protein conjugates and  
450 might be degraded by p62-dependent autophagy. The  $\alpha\beta1$  integrin could be degraded in a ligand (fibronectin)-  
451 dependent manner<sup>58</sup>. However, no  $\beta2$  integrin ligands (FGA, FGB and FGG) and p62 were observed in the mass  
452 spectrometry results, which indicated that the degradation of CD11a, CD11b, CD18 and Rap1 was not dependent  
453 on ligands or p62 in neutrophils. Notably, Hsc70 (P11142) was identified from four IP complexes and could be  
454 reciprocally coimmunoprecipitated with CD11a, CD11b, CD18 and Rap1. Furthermore, CD11b, CD18, and AG,  
455 SG, and GG marker proteins (MPO: P05164, lactoferrin: P02788 and MMP-9: P14780, respectively) were also  
456 observed in the IP complexes of Hsc70 by the shotgun approach ([Table S7](#)). Coincidentally, MPO, lactoferrin and  
457 MMP-9 were also identified in the IP complexes of CD11a, CD11b, CD18 and Rap1. In addition, Hsc70  
458 colocalized with MPO, lactoferrin and MMP-9 on AGs, SGs and GGs, respectively. These results suggested that  
459 CD11a, CD11b, CD18 and Rap1 were delivered by Hsc70 to lysosomes for degradation. However, **the special**  
460 **motif (KFERQ)** was not found in peptides of the CD11a, CD11b, CD18 and Rap1. Hsc70 might **a interact with a**  
461 **partner protein of the adhesion molecules with the motif and delivered them to the lysosome for degradation.**  
462 Notably, Hsc70 knockdown attenuated autophagy-mediated degradation of CD11a, CD11b, CD18 and Rap1,  
463 thereby increasing the adhesion of HL-60 cells. Taken together, the results showed that CD11a, CD11b, CD18 and  
464 Rap1 could be degraded via autophagy.

465 Our data demonstrated that autophagy induced by PA decreased the adhesion of PA-treated and NAFLD  
466 neutrophils. However, the underlying mechanism was unclear. Interestingly, using quantitative proteomic analysis,  
467 we found that a downstream target of PKC $\alpha$ , namely, PKD2<sup>59</sup>, a key regulatory protein of autophagy<sup>60</sup>, was  
468 significantly downregulated. PKC $\alpha$  is a negative regulator of autophagy in neuroepithelial cells<sup>23</sup>. Our data showed  
469 that PKC $\alpha$ /PKD2 was indeed inhibited in PA-treated and NAFLD neutrophils. Moreover, pharmacological  
470 inhibition of PKC $\alpha$ /PKD2 by GO6983 strongly induced neutrophil autophagy, vacuolation and decreased  
471 neutrophil adhesion, while PKD2 overexpression significantly attenuated the PA-induced autophagy, vacuolation  
472 and decrease in adhesion. These results indicated that PKC $\alpha$ /PKD2 pathway was involved in PA-induced  
473 autophagy and then caused neutrophil vacuolation and a decrease in adhesion. A previous study indicated that PKC  
474 inhibitors dramatically induced autophagy<sup>22</sup>, which further support our conclusion.

475 Collectively, this study reveals that PA inhibited the p-PKC $\alpha$ /PKD2 pathway to induce autophagy (*in vitro* and  
476 *ex vivo*), which caused neutrophil vacuolation, promoted the degradation of CD11a, CD11b, CD18 and Rap1 and



477 further decreased neutrophil adhesion, thereby impairing neutrophil immunity. Notably, we found that the three  
478 neutrophil granule subunits, namely, AGs, SGs and GGs, were degraded by autophagy. This phenomenon might be  
479 termed “granulophagy” (a combination of “granule” and “autophagy”). In addition to adhesion-associated proteins,  
480 proteins associated with endocytosis, phagocytosis, phagosomes, chemotaxis, microbicidal substances,  
481 cytoskeleton remodeling, etc. are also present on AGs, SGs, and GGs<sup>2</sup>, and these proteins might be degraded by  
482 autophagy. It still remains to be determined if, besides adhesion, the ability of neutrophils to migrate and to kill  
483 microbes is also affected by PA or is impaired in NAFLD PMNs. Autophagy might be an immune switch for  
484 neutrophils that control the above biological functions. Understanding the mechanisms of autophagy-induced  
485 degradation of intracellular immune-associated proteins is fundamental to the identification of new therapeutic  
486 strategies against metabolic disease-induced innate immune deficiency. Neutrophil vacuolation, an indicator of the  
487 immune status of patient<sup>34</sup>, is associated with autophagy resulting from changes in blood constituents. Therefore,  
488 further research is needed to investigate the effects of the metabolic disorders on the autophagy and vacuolation of  
489 neutrophils, which will provide a new therapeutic strategy to improve the immune deficiency resulting from the  
490 above diseases.

#### 491 **Acknowledgments**

492 This work was supported by the National Key Research and Development Program (Beijing, China; grant no.  
493 2016YFD0501206), the National Natural Science Foundation of China (Beijing, China; grant no. 31372494,  
494 31672621, and 31772810) and the Jilin Natural Science Foundation (Changchun, China; grant no. 20170101148JC)  
495 and the International Postdoctoral Exchange Fellowship Program (20190057). **We thank Dr. Fabien Loison for**  
496 **assistance with editing and grammar correction.**

#### 497 **Authorship Contributions**

498 Z.C.P., A.Y.H designed the study, performed experiments, analyzed most data, and wrote the manuscript; H.Y.W.  
499 contributed to the Normal and NAFLD samples and edited the manuscript; Y.C.Y., B.C.F., X.L.D., Y.F.L., Y.W.Z.  
500 performed experiments, analyzed the data and assisted in generating LV-GFP-shATG5, LV-GFP-shAp62, LV-GFP-  
501 shHsc70 and LV-GFP-PRKD2 HL-60 cells, and contributed to writing the manuscript; X.B.L., Z.W., G.W.L.,  
502 X.W.L. jointly directed this work, including designed, analyzed, supervised overall project, and co-wrote the  
503 manuscript, with input from all authors.

504 **Disclosure of Conflicts of Interest:** The authors declare no competing financial interests.

505 **Correspondence:** Guowen Liu, Key Laboratory of Zoonosis, Ministry of Education, College of Veterinary  
506 Medicine, Jilin University, Changchun, 130062, China; e-mail: liuguowen2008@163.com.

507 **References**

- 508 1. Németh T, Sperandio M, Mócsai A. Neutrophils as emerging therapeutic targets. *Nature Reviews Drug*  
509 *Discovery*. 2020;1-23.
- 510 2. Lominadze G, Powell DW, Luerman GC, Link AJ, Ward RA, Mcleish KR. Proteomic analysis of human neutrophil  
511 granules. *Molecular & Cellular Proteomics Mcp*. 2005;4(10):1503.
- 512 3. ZHANG L. The  $\alpha$  M  $\beta$  2 integrin and its role in neutrophil function. *Cell research*. 1999;9(3):171-178.
- 513 4. Bainton DF, Miller LJ, Kishimoto TK, Springer TA. Leukocyte adhesion receptors are stored in peroxidase-  
514 negative granules of human neutrophils. *Journal of Experimental Medicine*. 1987;166(6):1641-1653.
- 515 5. Pellinen T, Ivaska J. Integrin traffic. *Journal of Cell Science*. 2006;119(Pt 18):3723-3731.
- 516 6. Williams MR, Azcutia V, Newton G, Alcaide P, Lusinskas FW. Emerging mechanisms of neutrophil recruitment  
517 across endothelium. *Trends in Immunology*. 2011;32(10):452-460.
- 518 7. Evans R, Patzak I, Svensson L, et al. Integrins in immunity. *Journal of Cell Science*. 2009;122(2):215-225.
- 519 8. Bos JL, De BK, Enserink J, et al. The role of Rap1 in integrin-mediated cell adhesion. *Biochemical Society*  
520 *Transactions*. 2003;31(1):83-86.
- 521 9. Kinashi T, Aker M, Sokolovskyeisenberg M, et al. LAD-III, a leukocyte adhesion deficiency syndrome associated  
522 with defective Rap1 activation and impaired stabilization of integrin bonds. *Blood*. 2004;103(3):1033-1036.
- 523 10. Dimanche MT, Le DF, Fischer A, Arnaout MA, Griscelli C, LisowskagrosPierre B. LFA-1 beta-chain synthesis and  
524 degradation in patients with leukocyte-adhesive proteins deficiency. *European Journal of Immunology*. 1987;17(3):417-  
525 419.
- 526 11. Abeliovich H. Guidelines for the use and interpretation of assays for monitoring autophagy. *Autophagy*. 2012.
- 527 12. Mihalache CC, Yousefi S, Conus S, Villiger PM, Schneider EM, Simon HU. Inflammation-associated autophagy-  
528 related programmed necrotic death of human neutrophils characterized by organelle fusion events. *Journal of*  
529 *Immunology*. 2011;186(11):6532.
- 530 13. Borregaard N, Cowland JB. Granules of the human neutrophilic polymorphonuclear leukocyte. *Blood*.  
531 1997;89(10):3503-3521.
- 532 14. Jin M, Liu X, Klionsky DJ. SnapShot: Selective Autophagy. *Cell*. 2013;152(1-2):368-368.e362.
- 533 15. Raiborg C, Stenmark H. The ESCRT machinery in endosomal sorting of ubiquitylated membrane proteins.  
534 *Nature*. 2009;458(7237):445-452.
- 535 16. Chua CEL, Gan BQ, Tang BL. Involvement of members of the Rab family and related small GTPases in  
536 autophagosome formation and maturation. *Cellular & Molecular Life Sciences*. 2011;68(20):3349-3358.
- 537 17. Eskelinen EL. Maturation of autophagic vacuoles in Mammalian cells. *Autophagy*. 2005;1(1):1-10.
- 538 18. Sahu R, Kaushik S, Clement CC, et al. Microautophagy of cytosolic proteins by late endosomes. *Developmental*  
539 *Cell*. 2011;20(1):131-139.
- 540 19. Roberts, Marnie, Barry, et al. PDGF-regulated rab4-dependent recycling of  $\alpha$ v $\beta$ 3 integrin from early endosomes  
541 is necessary for cell adhesion and spreading. *Current Biology*. 2001;11(18):1392-1402.
- 542 20. Ng T, Shima D, Squire A, et al. PKC $\alpha$  regulates  $\beta$ 1 integrin-dependent cell motility through association and  
543 control of integrin traffic. *Embo Journal*. 2014;18(14):3909-3923.
- 544 21. Tan SH, Shui G, Zhou J, et al. Induction of autophagy by palmitic acid via protein kinase C-mediated signaling  
545 pathway independent of mTOR (mammalian target of rapamycin). *Journal of Biological Chemistry*. 2012;287(18):14364-  
546 14376.
- 547 22. Jiang H, Cheng D, Liu W, Peng J, Feng J. Protein kinase C inhibits autophagy and phosphorylates LC3.  
548 *Biochemical & Biophysical Research Communications*. 2010;395(4):471-476.
- 549 23. Wang F, Xu C, Reece EA, et al. Protein kinase C-alpha suppresses autophagy and induces neural tube defects via

- 550 miR-129-2 in diabetic pregnancy. *Nature Communications*. 2017;8:15182.
- 551 24. Wegner CS, Malerød L, Pedersen NM, et al. Erratum to: Ultrastructural characterization of giant endosomes  
552 induced by GTPase-deficient Rab5. *Histochemistry & Cell Biology*. 2010;133(1):57.
- 553 25. Kjeldsen L, Bainton DF, Sengelov H, Borregaard N. Structural and functional heterogeneity among peroxidase-  
554 negative granules in human neutrophils: identification of a distinct gelatinase-containing granule subset by combined  
555 immunocytochemistry and subcellular fractionation. 1993.
- 556 26. Kjeldsen L, Sengelov H, Lollike K, Nielsen MH, Borregaard N. Isolation and characterization of gelatinase  
557 granules from human neutrophils. 1994.
- 558 27. Bainton DF, Ulliyot JL, Farquhar MG. The development of neutrophilic polymorphonuclear leukocytes in human  
559 bone marrow. *Journal of Experimental Medicine*. 1971;134(4):907-934.
- 560 28. Cramer E, Pryzwansky KB, Villevall JL, Testa U, Breton-Gorius J. Ultrastructural localization of lactoferrin and  
561 myeloperoxidase in human neutrophils by immunogold. *Blood*. 1985;65(2):423-432.
- 562 29. Kjeldsen L, Bainton DF, Sengeløv H, Borregaard N. Structural and functional heterogeneity among peroxidase-  
563 negative granules in human neutrophils: identification of a distinct gelatinase-containing granule subset by combined  
564 immunocytochemistry and subcellular fractionation. *Blood*. 1993;82(10):3183.
- 565 30. Kjeldsen L, Sengeløv H, Lollike K, Nielsen MH, Borregaard N. Isolation and characterization of gelatinase  
566 granules from human neutrophils. *Blood*. 1994;83(6):1640.
- 567 31. Donghua G, Qinghe Z, Hong Z, Dongbo S. Proteomic analysis of membrane proteins of vero cells: exploration of  
568 potential proteins responsible for virus entry. *Dna & Cell Biology*. 2014;33(1):20-28.
- 569 32. Léger T, Garcia C, Ounissi M, Lelandais G, Camadro JM. The metacaspase Mca1p has a dual role in farnesol-  
570 induced apoptosis in *Candida albicans*. *Molecular & Cellular Proteomics Mcp*. 2015;14(1):93.
- 571 33. Yi Z, Hong X, Hao C, et al. Proteomic analysis of solid pseudopapillary tumor of the pancreas reveals  
572 dysfunction of the endoplasmic reticulum protein processing pathway. *Molecular & Cellular Proteomics*.  
573 2014;13(10):2593-2603.
- 574 34. Grange MJ, Brivet F, Boumier P, Tchernia G. [Diagnostic and prognostic values of vacuolated polymorphonuclear  
575 neutrophils (author's transl)]. *La Nouvelle Presse Medicale*. 1980;9(35):2553.
- 576 35. Chetty-Raju N, Cook R, Erber WN. Vacuolated neutrophils in ethanol toxicity. *British Journal of Haematology*.  
577 2004;127(5):478.
- 578 36. Zieve PD, Haghshenass M, Blanks M, Krevans JR. Vacuolization of the neutrophil. An aid in the diagnosis of  
579 septicemia. *Archives of Internal Medicine*. 1966;118(4):356.
- 580 37. Tang S, Zhang Y, Yin SW, et al. Neutrophil extracellular trap formation is associated with autophagy-related  
581 signalling in ANCA-associated vasculitis. *Clinical & Experimental Immunology*. 2015;180(3):408-418.
- 582 38. Elmore SP, Qian T, Grissom SF, Lemasters JJ. The mitochondrial permeability transition initiates autophagy in rat  
583 hepatocytes. *Faseb Journal Official Publication of the Federation of American Societies for Experimental Biology*.  
584 2001;15(12):2286.
- 585 39. Welchman RL, Gordon C, Mayer RJ. Ubiquitin and ubiquitin-like proteins as multifunctional signals. *Nature*  
586 *Reviews Molecular Cell Biology*. 2005;6(8):599-609.
- 587 40. Orenstein SJ, Cuervo AM. Chaperone-mediated autophagy: Molecular mechanisms and physiological relevance.  
588 *Seminars in Cell & Developmental Biology*. 2010;21(7):719-726.
- 589 41. Zuckerfranklin D, Hirsch JG. ELECTRON MICROSCOPE STUDIES ON THE DEGRANULATION OF RABBIT  
590 PERITONEAL LEUKOCYTES DURING PHAGOCYTOSIS. *Journal of Experimental Medicine*. 1964;120(4):569.
- 591 42. Borregaard N, Lollike K, Kjeldsen L, et al. Human neutrophil granules and secretory vesicles. *European Journal*

- 592 of *Haematology*. 1993;51(4):187.
- 593 43. László L, Doherty FJ, Watson A, et al. Immunogold localisation of ubiquitin-protein conjugates in primary  
594 (azurophilic) granules of polymorphonuclear neutrophils. *Febs Letters*. 1991;279(2):175-178.
- 595 44. Lominadze G, Powell DW, Luerman GC, Link AJ, Ward RA, McLeish KR. Proteomic analysis of human neutrophil  
596 granules. *Molecular & Cellular Proteomics*. 2005;4(10):1503-1521.
- 597 45. Berrier AL, Yamada KM. Cell-matrix adhesion. *Journal of Cellular Physiology*. 2010;213(3):565-573.
- 598 46. Borregaard N. Neutrophils, from marrow to microbes. *Immunity*. 2010;33(5):657-670.
- 599 47. Tuloup-Minguez VR, Hamañ A, Greffard A, Nicolas VR, Codogno P, Botti JL. Autophagy modulates cell migration  
600 and  $\beta$ 1 integrin membrane recycling. *Cell Cycle*. 2013;12(20):3317-3328.
- 601 48. Briggs RT, Drath DB, Karnovsky ML, Karnovsky MJ. Localization of NADH oxidase on the surface of human  
602 polymorphonuclear leukocytes by a new cytochemical method. *Journal of Cell Biology*. 1975;67(3):566-586.
- 603 49. Rikihisa Y. Glycogen autophagosomes in polymorphonuclear leukocytes induced by rickettsiae. *Anatomical  
604 Record-advances in Integrative Anatomy & Evolutionary Biology*. 1984;208(3):319-327.
- 605 50. Quie PG, White JG, Holmes B, Good RA. In vitro bactericidal capacity of human polymorphonuclear leukocytes:  
606 diminished activity in chronic granulomatous disease of childhood. *Journal of Clinical Investigation*. 1967;46(4):668-679.
- 607 51. Matsuda N, Sato S, Shiba K, et al. PINK1 stabilized by mitochondrial depolarization recruits Parkin to damaged  
608 mitochondria and activates latent Parkin for mitophagy. *Journal of Cell Biology*. 2010;189(2):211-221.
- 609 52. Zucker-Franklin D, Hirsch JG. Electron microscope studies on the degranulation of rabbit peritoneal leukocytes  
610 during phagocytosis. *The Journal of experimental medicine*. 1964;120(4):569.
- 611 53. Borregaard N, Lollike K, Kjeldsen L, et al. Human neutrophil granules and secretory vesicles. *European journal  
612 of haematology*. 1993;51(4):187-198.
- 613 54. Papadopoulos C, Meyer H. Detection and clearance of damaged lysosomes by the endo-lysosomal damage  
614 response and lysophagy. *Current Biology*. 2017;27(24):R1330-R1341.
- 615 55. Bhattacharya A, Wei Q, Shin JN, et al. Autophagy is required for neutrophil-mediated inflammation. *Cell  
616 reports*. 2015;12(11):1731-1739.
- 617 56. Haglund K, Dikic I. Ubiquitylation and cell signaling. *Embo Journal*. 2005;24(19):3353-3359.
- 618 57. Ohtake F, Baba A, Takada I, et al. Dioxin receptor is a ligand-dependent E3 ubiquitin ligase. *Nature*.  
619 2007;446(7135):562-566.
- 620 58. Lobert VH, Brech APedersen NM, Wesche J, Oppelt A, Malerod L, Stenmark H. Ubiquitination of alpha 5 beta 1  
621 integrin controls fibroblast migration through lysosomal degradation of fibronectin-integrin complexes. *Developmental  
622 Cell*. 2010;19(1):148.
- 623 59. Sturany S, Van JL, Gilchrist A, Vandenheede JR, Adler G, Seufferlein T. Mechanism of activation of protein kinase  
624 D2(PKD2) by the CCK(B)/gastrin receptor. *Journal of Biological Chemistry*. 2002;277(33):29431.
- 625 60. Eisenberglerner A, Kimchi A. PKD is a kinase of Vps34 that mediates ROS-induced autophagy downstream of  
626 DAPk. *Cell Death & Differentiation*. 2012;19(5):788-797.

627

628

629

630

631

632

633

634

635

636

637

638

639

640

641

642

643

644

645 Visual Abstract

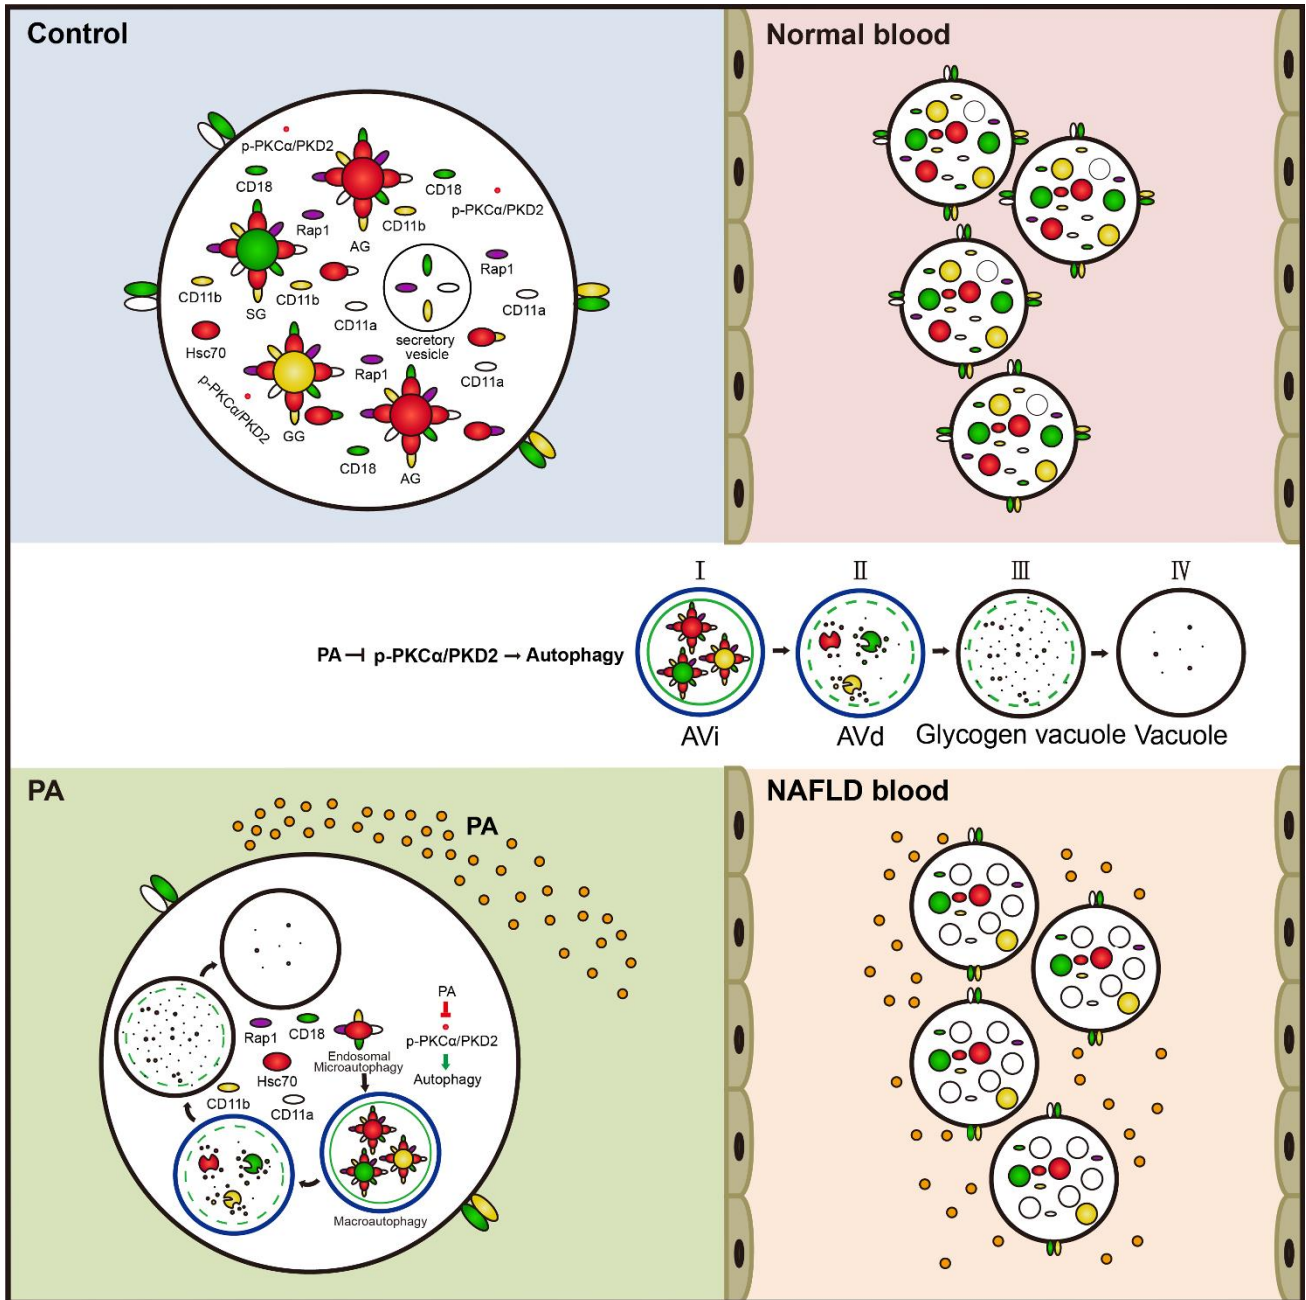

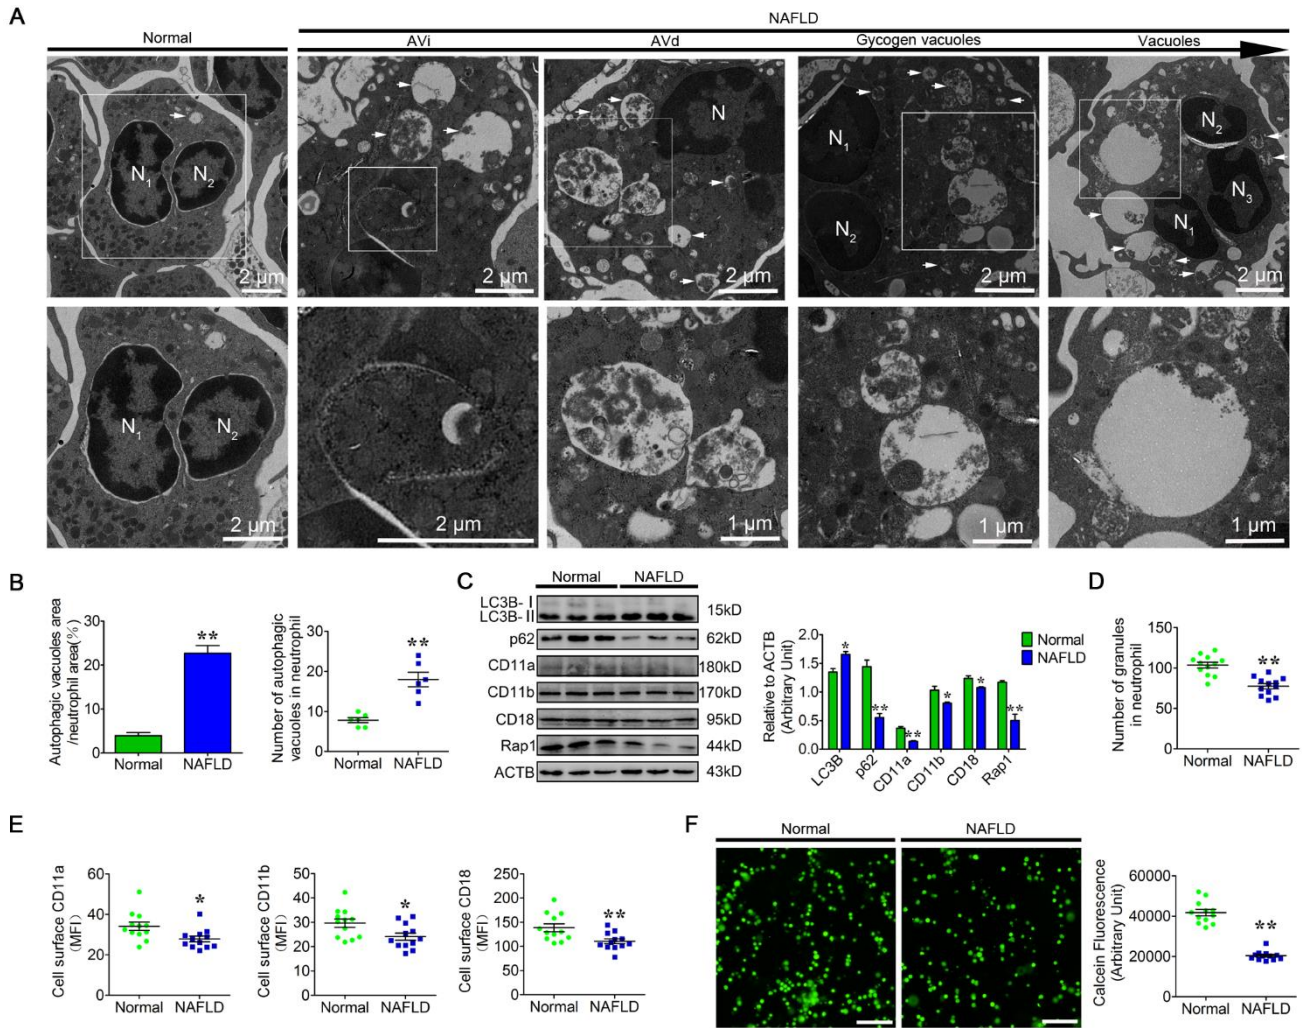

647

648 **Figure 1. Autophagy-dependent Vacuolation and Adhesion Deficiency Existed in NAFLD Neutrophils**

649 **NAFLD neutrophils for transmission electron microscope were directly fixed after isolated from the patient's blood**  
 650 **without incubation, for adhesion assay, normal and NAFLD neutrophils were incubated with the subjects serum.**

651 (A) Representative transmission electron micrographs of normal and NAFLD neutrophils. White arrows indicate  
 652 autophagic vacuoles (AVi, AVd, glycogen vacuoles and vacuoles). N (N1, N2, N3), nucleus. Scale bars as indicated.

653 (B) The area ratio of autophagic vacuoles to neutrophils and the number of autophagic vacuoles in neutrophils were  
 654 determined (n = 6). **Data represent the mean ± s.e.m. (\*\* P < 0.01 versus the control group; Significance calculated**  
 655 **using t test).**

656 (C) Immunoblot for LC3B, p62, CD11a, CD11b, CD18, and Rap1 in normal and NAFLD neutrophils. ACTB was  
 657 used as a loading control (n = 3). **Data represent the mean ± s.e.m. (\* P < 0.05 and \*\* P < 0.01 versus the control**  
 658 **group; Significance calculated using two-way ANOVA).**

659 (D) The number of granules in normal and NAFLD neutrophils was determined (n = 12). **Data represent the mean ±**  
660 **s.e.m. (\*\* P < 0.01 versus the control group; Significance calculated using t test).**

661 (E) Surface expression of CD11a, CD11b and CD18 on normal and NAFLD neutrophils (n = 12). Surface  
662 expression of CD11a, CD11b and CD18 was assessed by flow cytometry analysis (n = 12). MFI, mean fluorescence  
663 intensity. **Data represent the mean ± s.e.m. (\* P < 0.05 and \*\* P < 0.01 versus the control group; Significance**  
664 **calculated using t test).**

665 (F) Representative fluorescence micrograph images (left) and fluorescence microplate analysis (right) of normal  
666 and NAFLD neutrophils adhered to HUVECs (n = 12). Scale bar, 400 µm. **Data represent the mean ± s.e.m. (\*\* P <**  
667 **0.01 versus the control group; Significance calculated using t test).**

668

669

670

671

672

673

674

675

676

677



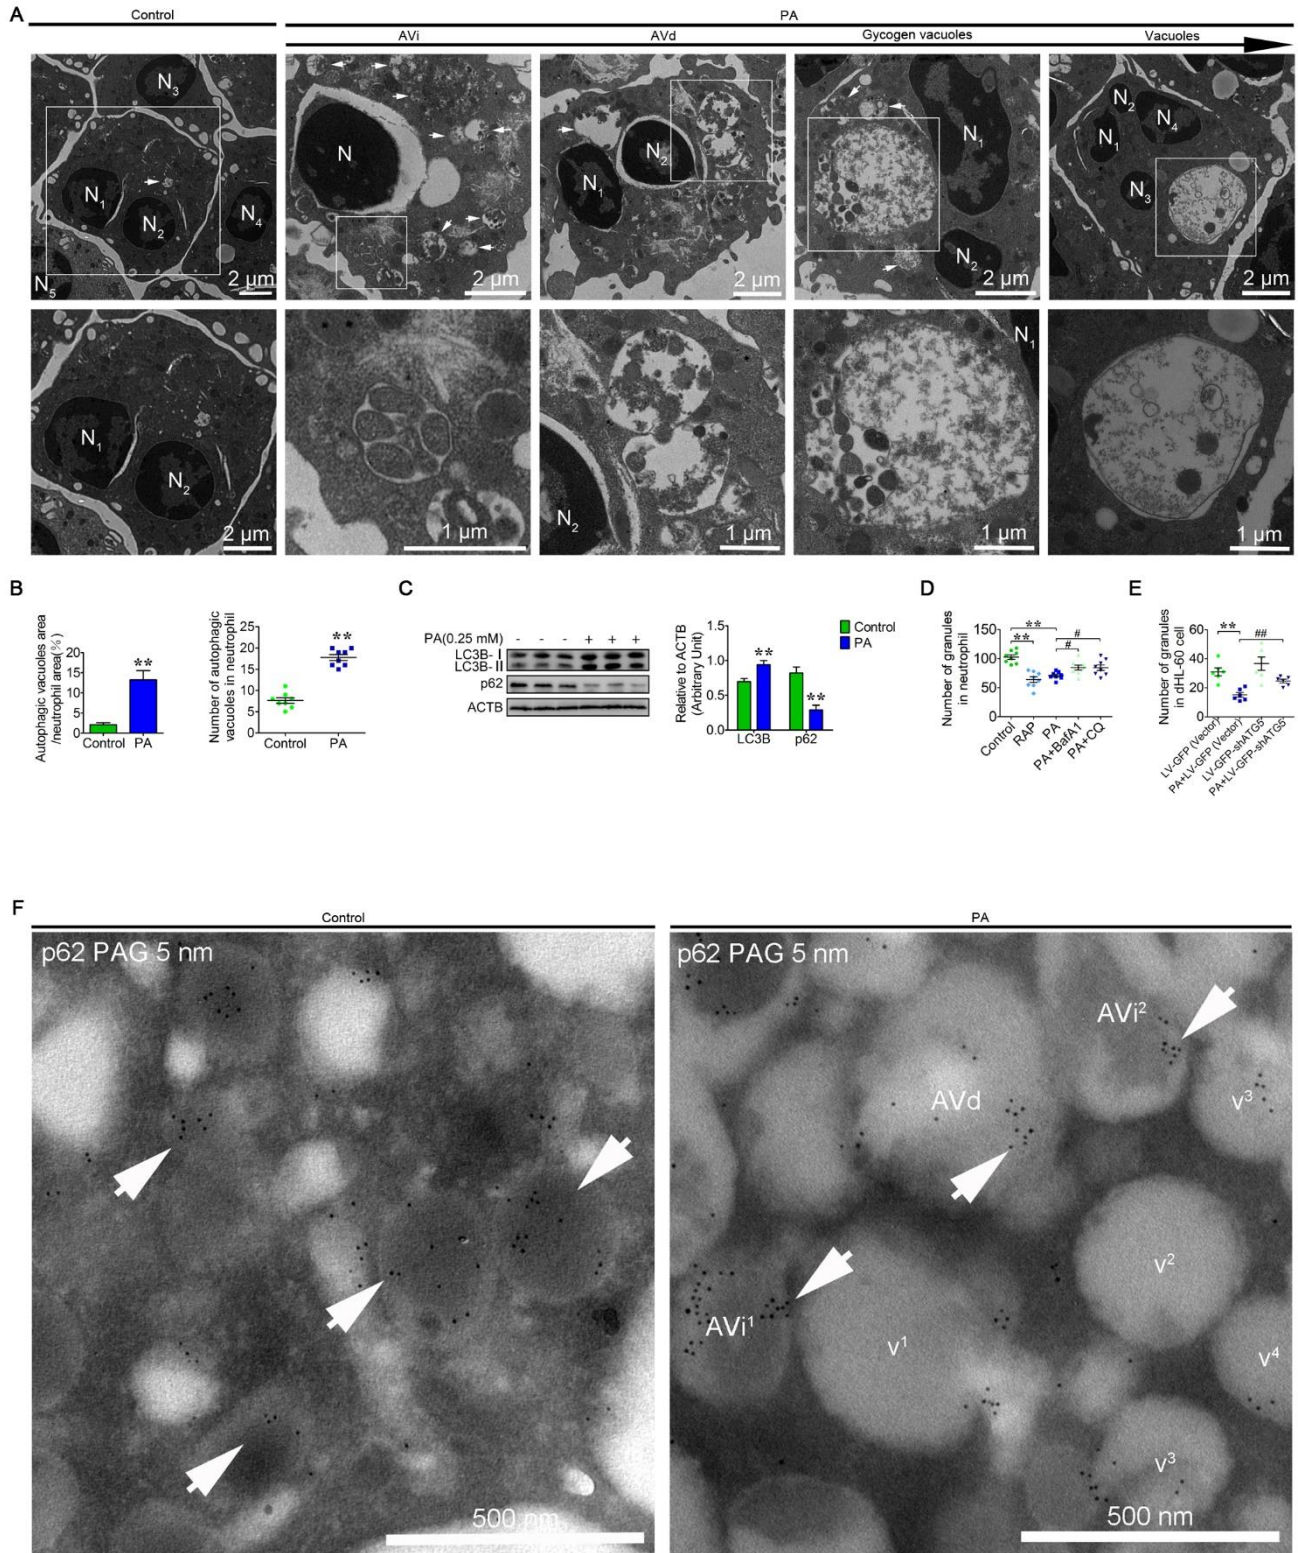

678

679

680

681

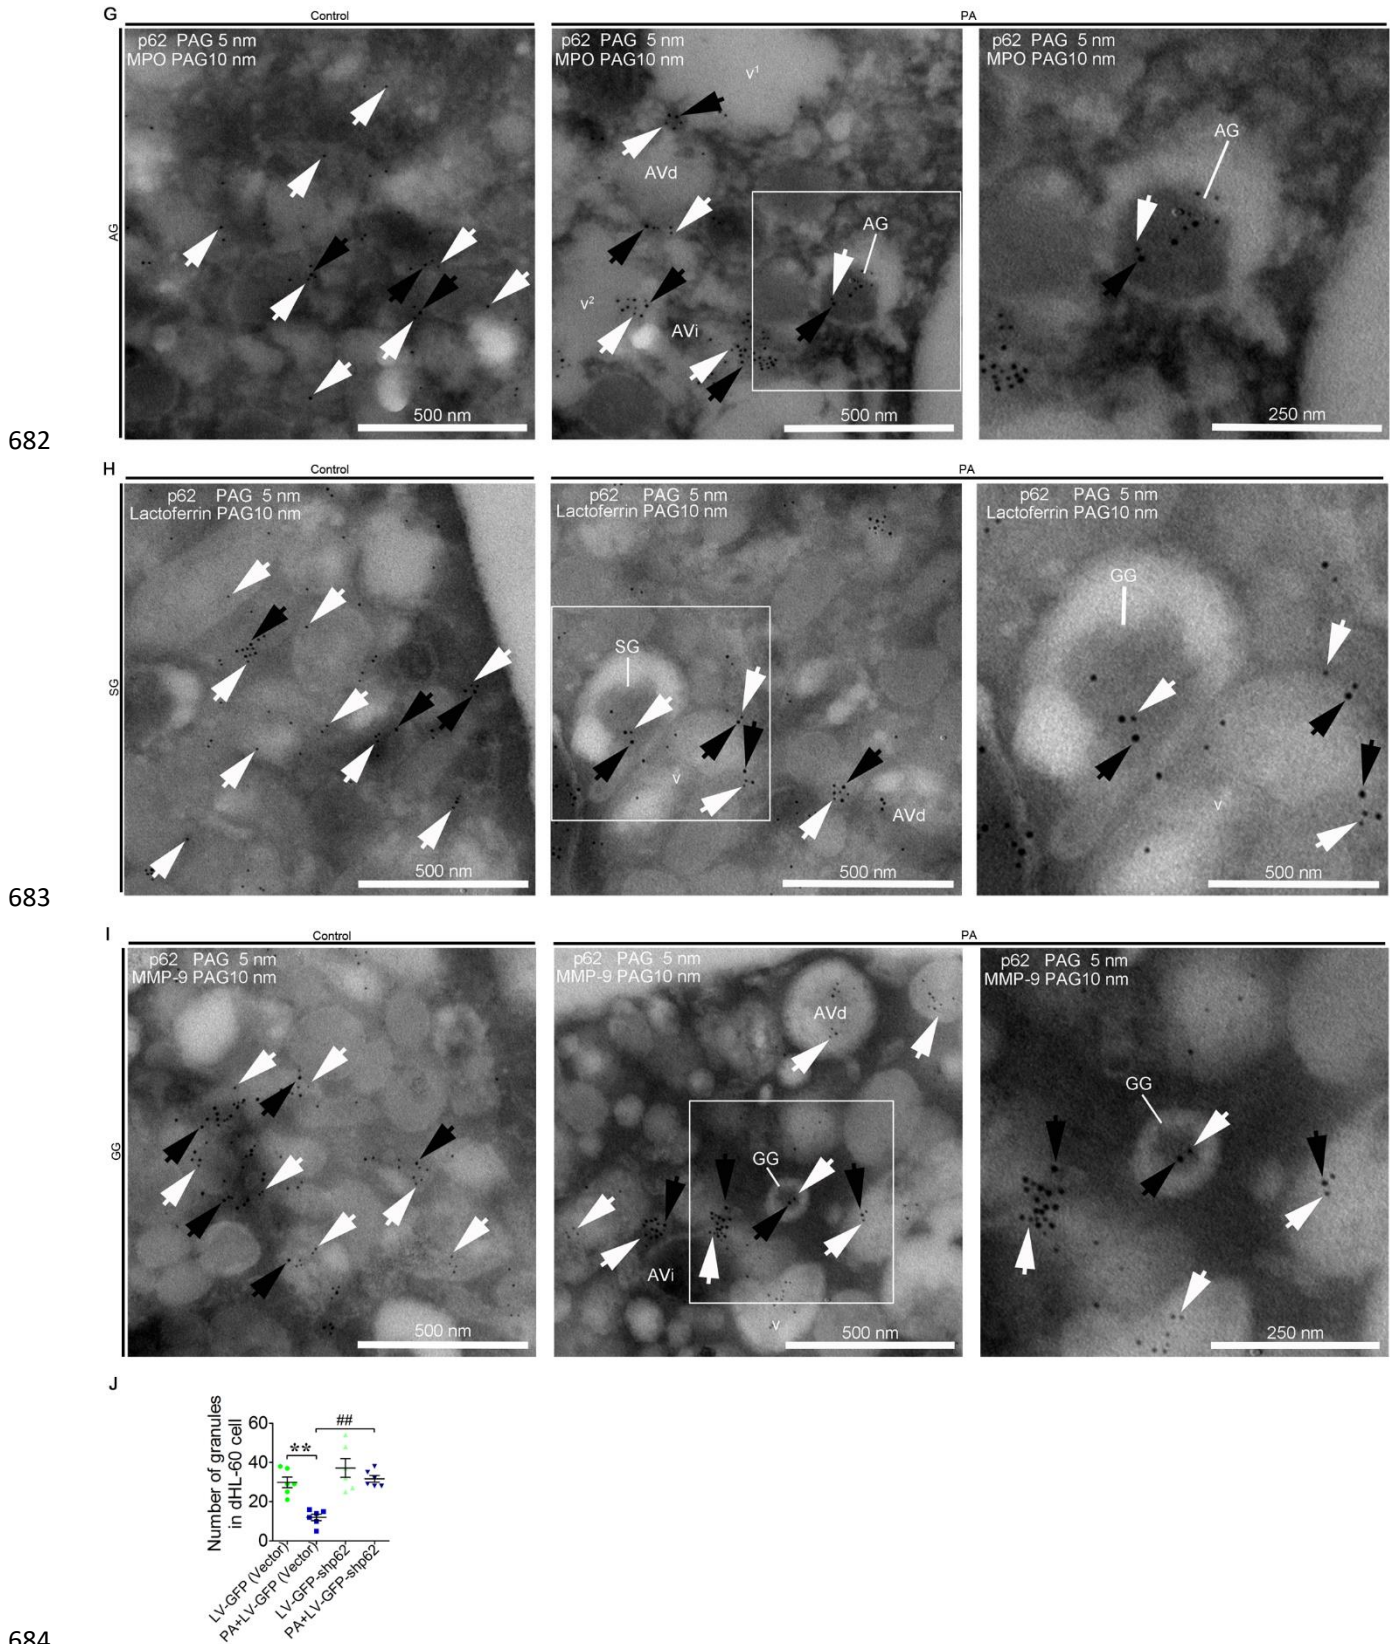

**Figure 2. PA Enhanced Autophagy and Degraded Granules in Neutrophils**

686 (A) Representative transmission electron micrographs of control and PA (0.25 mM)-treated neutrophils (left).  
687 White arrows indicate autophagic vacuoles (AV<sub>i</sub>, AV<sub>d</sub>, glycogen vacuoles and vacuoles). N (N<sub>1</sub>, N<sub>2</sub>, N<sub>3</sub>...),  
688 nucleus. Scale bars as indicated.

689 (B) The area ratio of autophagic vacuoles to neutrophils and the number of autophagic vacuoles in neutrophils were  
690 determined (right, n = 8). Data represent the mean ± s.e.m. (\*\* P < 0.01 versus the control group; Significance  
691 calculated using t test).

692 (C) Immunoblot for LC3B and p62 in control and PA-treated neutrophils (n = 3). Data represent the mean ± s.e.m.  
693 (\*\* P < 0.01 versus the control group; Significance calculated using two-way ANOVA).

694 (D) The number of granules in control, RAP and PA-treated (treated or not treated with BafA1, CQ) neutrophils  
695 was determined (n = 8). Data represent the mean ± s.e.m. (\*\* P < 0.01 versus the control group, # < 0.05 and versus  
696 the PA-treated group; Significance calculated using one-way ANOVA).

697 (E) The number of granules in control and PA-treated dHL-60 cells (infected with LV-GFP-shATG5 or empty  
698 lentivectors) was determined (n = 6). Data represent the mean ± s.e.m (\*\* P < 0.01 versus the control group, ## p <  
699 0.01 versus the PA-treated group; Significance calculated using one-way ANOVA).

700 (F) Immunogold electron micrograph showing the localization of p62 in control and PA-treated neutrophils. Five-  
701 nanometer p62 grains (white arrows) were observed on the granules (control) and autophagic vacuoles (PA). Scale  
702 bars as indicated.

703 (G-I) Partial view of immunogold electron micrograph showing the colocalization of p62 with the AG marker MPO  
704 (G), SG marker lactoferrin (H) and GG marker MMP-9 (I) in control and PA-treated neutrophils. White arrows (5-  
705 nm gold grains) indicate p62. Black arrows (10-nm gold grains) indicate MPO, lactoferrin and MMP-9. v (v<sub>1</sub>, v<sub>2</sub>,  
706 v<sub>3</sub>...), vacuoles. Scale bars as indicated.

707 (J) The number of granules in control and PA-treated dHL-60 cells (infected with LV-GFP-shp62 or empty  
708 lentivectors) was determined (n = 6). Data represent the mean ± s.e.m. (\*\* P < 0.01 versus the control group, ## p <  
709 0.01 versus the PA-treated group; Significance calculated using one-way ANOVA).

710

711

712

713

714

715

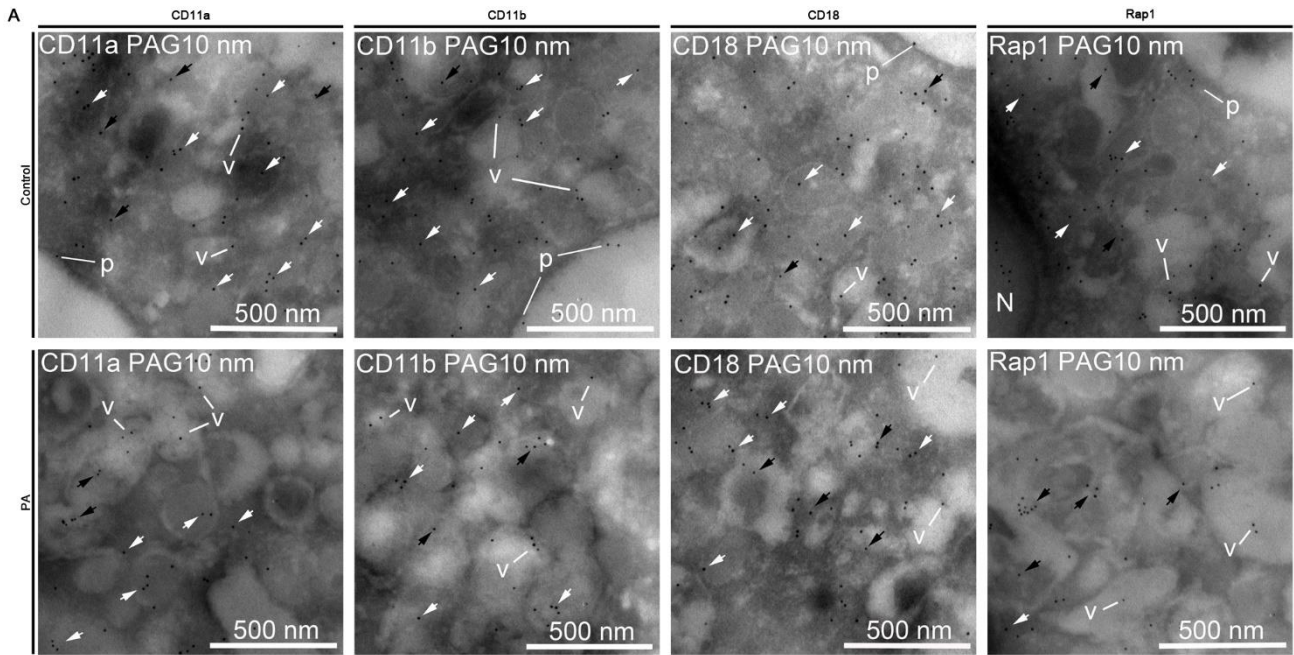

716

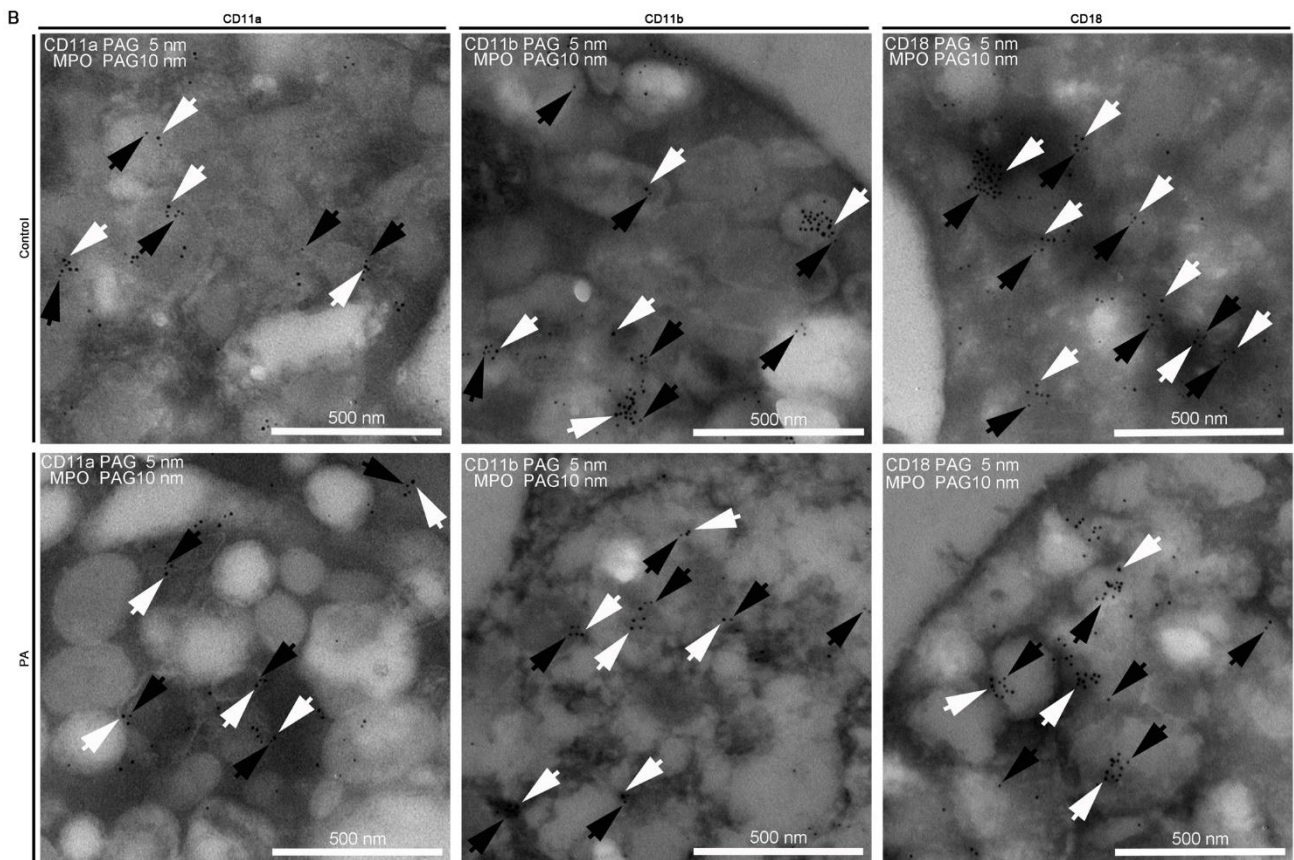

717

718

719

720

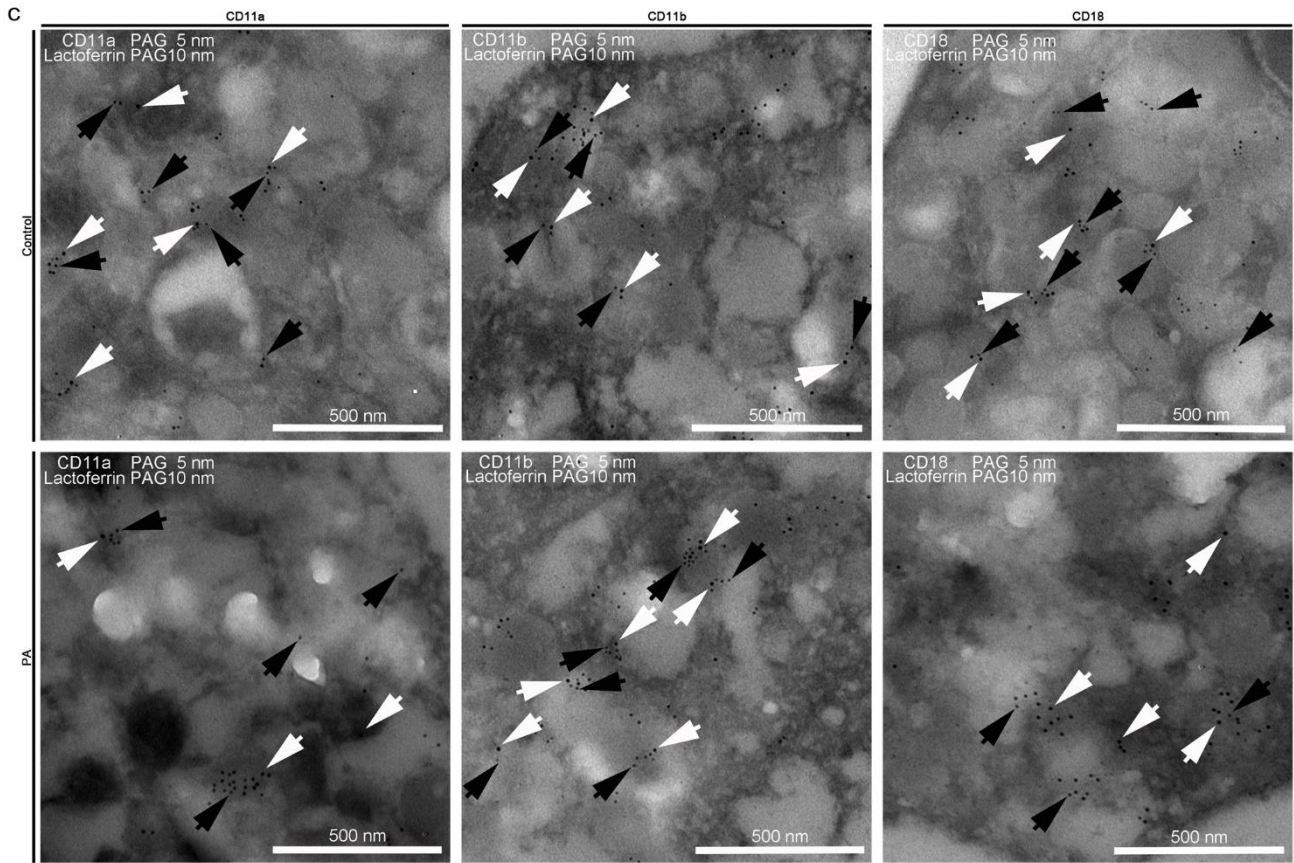

721  
722

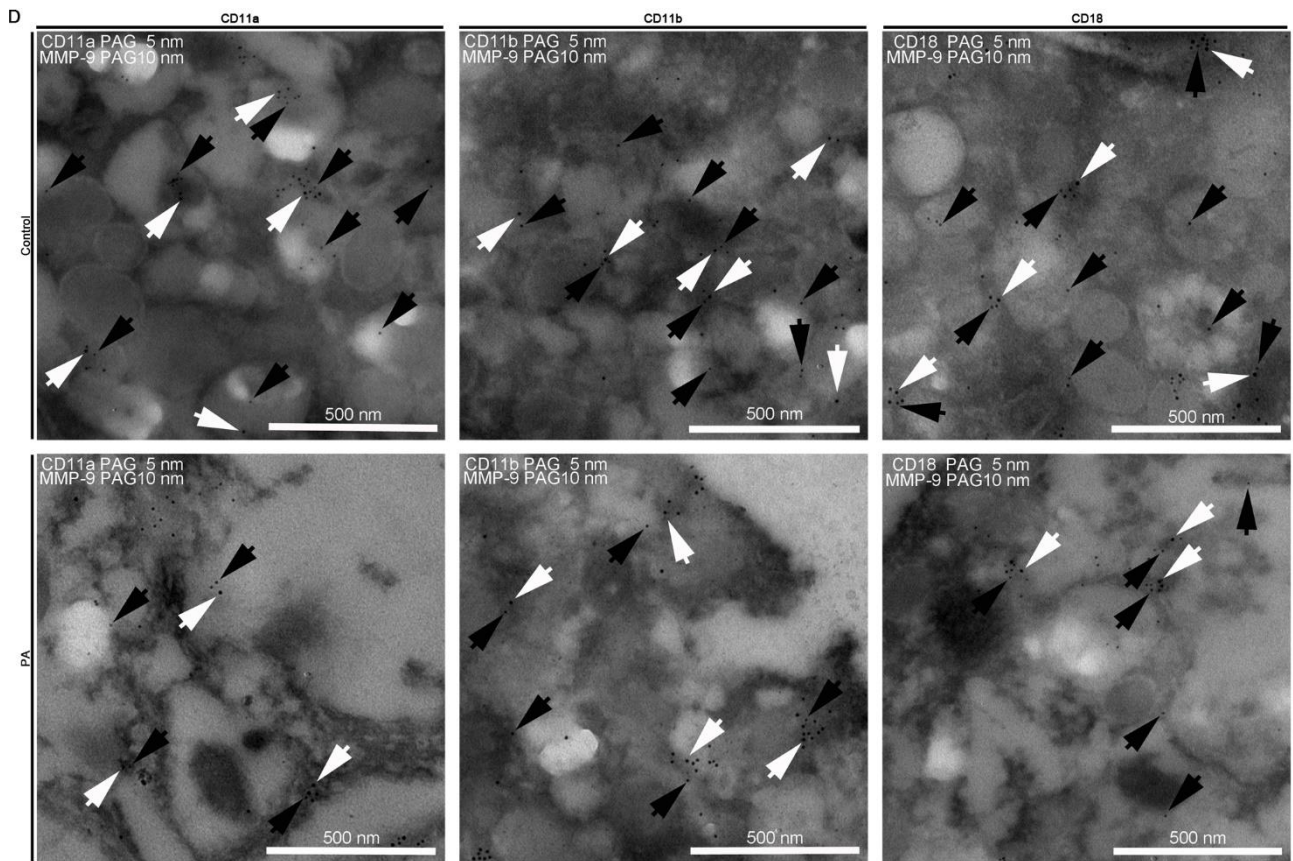

723

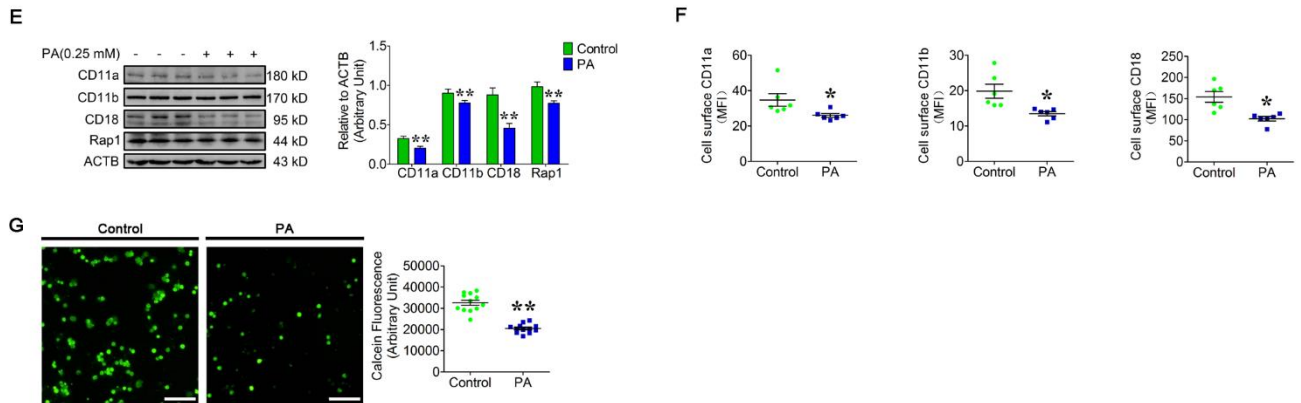

724

725

### 726 **Figure 3. PA-induced Autophagy Decreased Neutrophil Adhesion**

727 (A) Portion of immunogold electron micrographs of control and PA-treated neutrophils labeled with CD11a,  
728 CD11b, CD18 and Rap1 (10 nm gold grains). White arrows show gold grains on the granules, black arrows show  
729 gold grains on AVi and AVd, and v show gold grains on vacuoles. N, nucleus. p, plasma membrane. Scale bars as  
730 indicated.

731 (B-D) Portion of immunogold electron micrographs of control and PA-treated neutrophils labeled for MPO (B),  
732 lactoferrin (C) or MMP-9 (D) (10-nm gold grains, white arrows) and then labeled for CD11a, CD11b or CD18,  
733 respectively (5-nm gold grains, black arrows). Scale bars as indicated.

734 (E) Immunoblot for the total protein expression of CD11a, CD11b, CD18 and Rap1 in control and PA-treated  
735 neutrophils (n = 3). **Data represent the mean  $\pm$  s.e.m. (\*\* P < 0.01 versus the control group; Significance calculated**  
736 **using two-way ANOVA).**

737 (F) Surface expression of CD11a, CD11b and CD18 on control and PA-treated neutrophils. Surface expression of  
738 CD11a, CD11b and CD18 was assessed by flow cytometry analysis (n = 6). MFI, mean fluorescence intensity. **Data**  
739 **represent the mean  $\pm$  s.e.m. (\* P < 0.05 versus the control group; Significance calculated using t test).**

740 (G) Representative fluorescence micrograph images (left) and fluorescence microplate analysis (right) of control  
741 and PA-treated neutrophils adhered to HUVECs. The fluorescence intensity indicated neutrophil adhesion and was  
742 detected by a fluorescence microplate reader (n = 12). Scale bar, 400  $\mu$ m. **Data represent the mean  $\pm$  s.e.m. (\*\* P <**  
743 **0.01 versus the control group; Significance calculated using t test).**

744

745

746

747

748

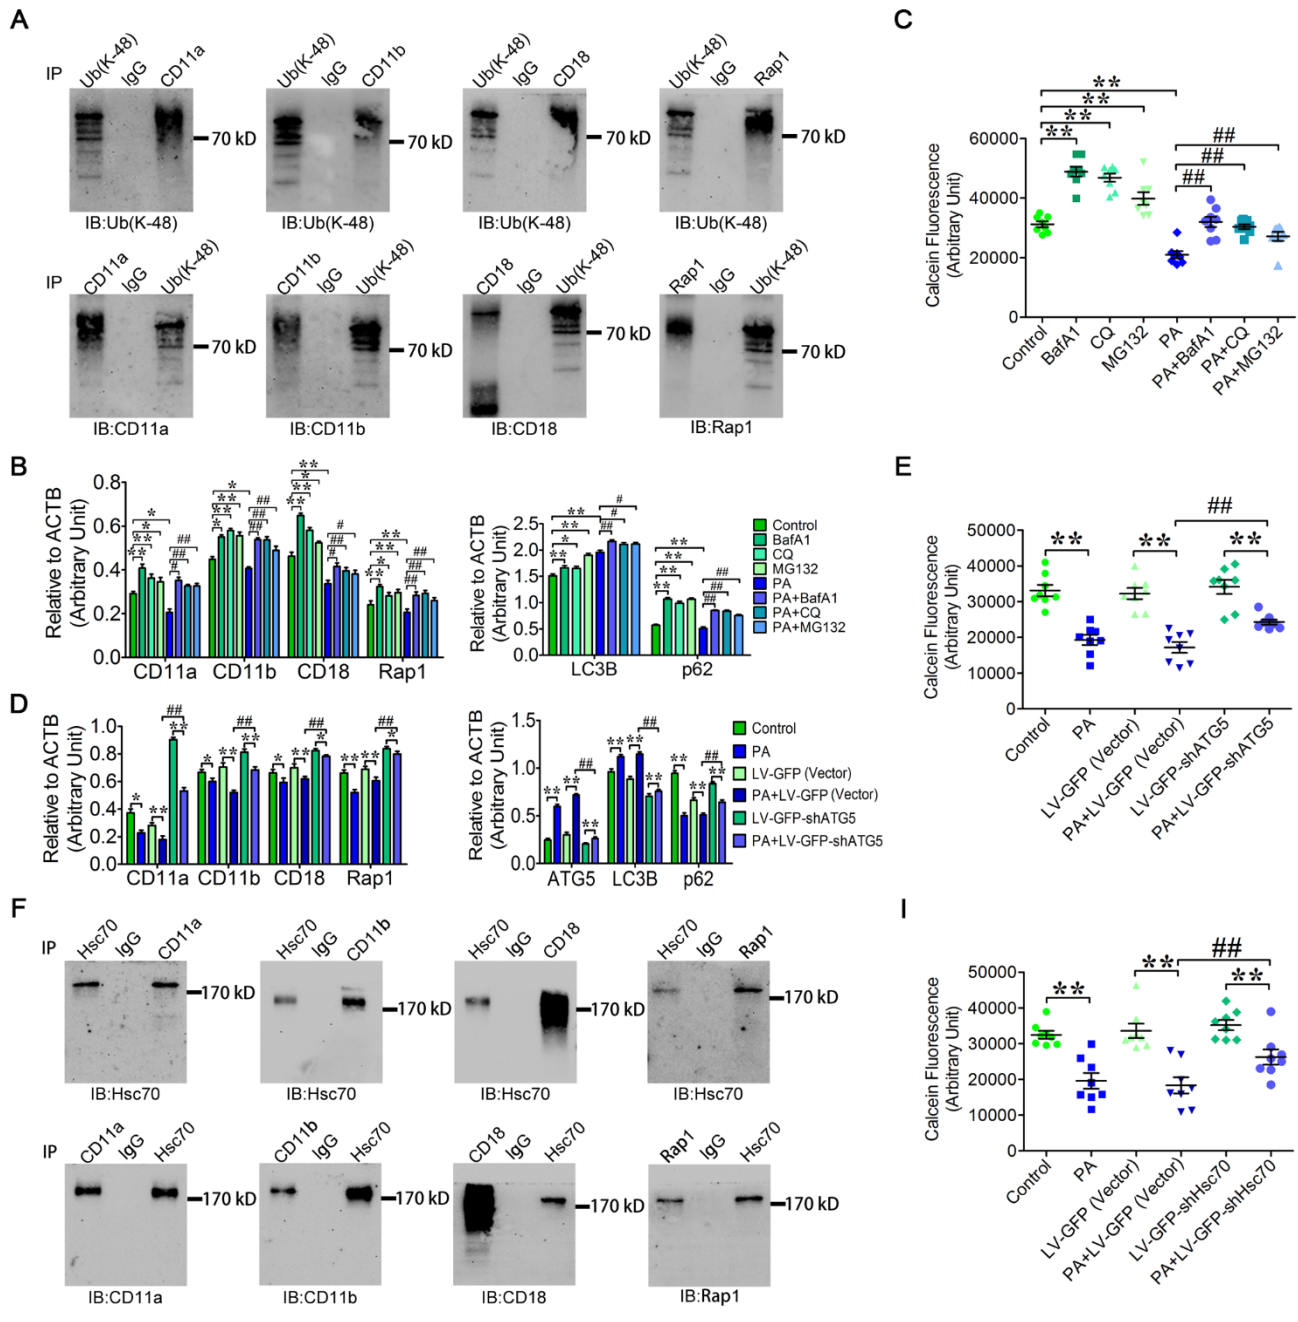

749

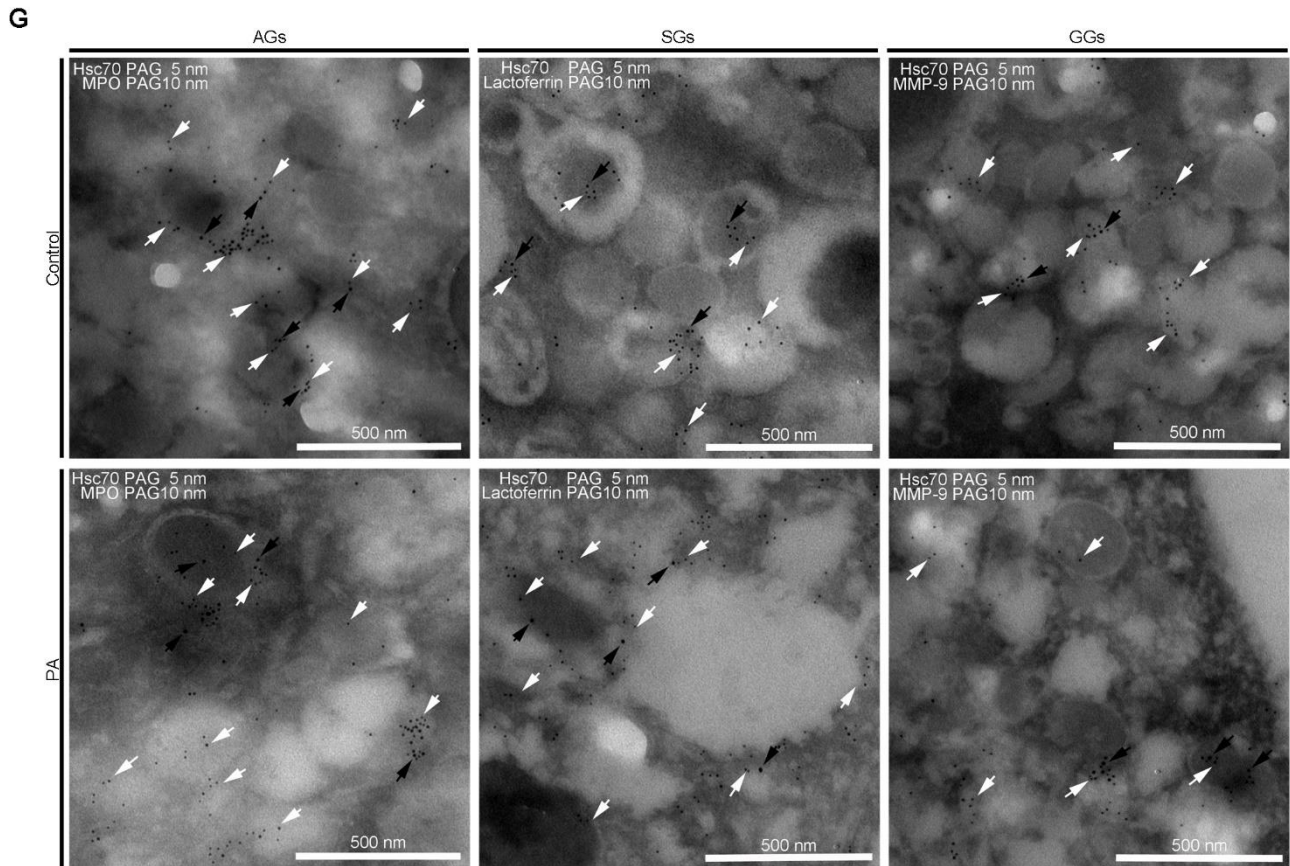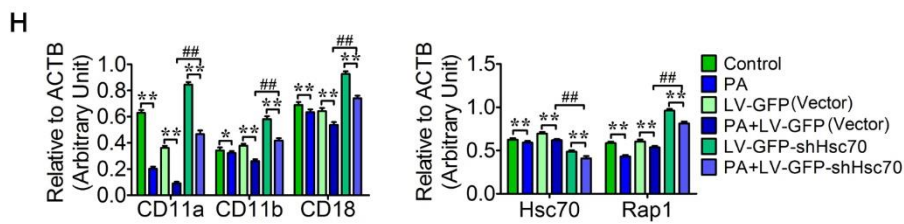

750

751 **Figure 4. Hsc70-Dependent CD11a, CD11b, CD18 and Rap1 Degradation by Autophagy Reduced Neutrophil**

752 **Adhesion**

753 (A) The CD11a, CD11b, CD18 and Rap1 protein complexes were modified with polyubiquitin chains (Lys48).

754 CD11a, CD11b, CD18, Rap1 and the polyubiquitinated proteins were immunoprecipitated from neutrophils and

755 then evaluated by immunoblotting.

756 (B-C) Inhibition of the degradation of CD11a, CD11b, CD18 and Rap1 increased neutrophil adhesion. The protein

757 degradation was blocked by BafA1, CQ or MG132 in control and PA-treated neutrophils. Quantitative analysis of

758 LC3B, p62, CD11a, CD11b, CD18 and Rap1 (B, n = 3) was performed, and neutrophil adhesion was detected with

759 a fluorescence microplate reader (C, n = 8). Data represent the mean  $\pm$  s.e.m. (\* P < 0.05 and \*\* P < 0.01 versus the

760 control group, # P < 0.05 and ## p < 0.01 versus the PA-treated group; Significance calculated using two-way

761 ANOVA).



762 (D-E) Knockdown of ATG5 significantly inhibited the autophagy and increased the adhesion of HL-60 cells. The  
763 HL-60 cells were infected with LV-GFP-shATG5 (to block autophagy) and LV-GFP (**Vector**) (negative controls).  
764 Quantitative analysis of LC3B, p62, ATG5, CD11a, CD11b, CD18 and Rap1 (D, n = 3) was performed to evaluate  
765 autophagic flux and protein accumulation. The adhesion of HL-60 cells was detected by a fluorescence microplate  
766 reader (E, n = 8). **Data represent the mean ± s.e.m. (\* P < 0.05 and \*\* P < 0.01 versus the control group, ## p < 0.01**  
767 **versus the PA-treated group; Significance calculated using two-way ANOVA).**

768 (F) Reciprocal co-IP of CD11a, CD11b, CD18 and Rap1 with Hsc70. The CD11a, CD11b, CD18, Rap1 and Hsc70  
769 protein complexes were immunoprecipitated and evaluated by immunoblotting individually.

770 (G) Portion of immunogold electron micrograph showing the localization of Hsc70 (5 nm, white arrows) with  
771 MPO, lactoferrin or MMP-9 (10 nm, black arrows) in control and PA-treated neutrophils. Scale bars as indicated.

772 (H-I) Knockdown of Hsc70 blocked the degradation of CD11a, CD11b, CD18 and Rap1 and increased the adhesion  
773 of HL-60 cells. The cells were infected with LV-GFP-shHsc70 and LV-GFP (**Vector**) (negative controls).  
774 Quantitative analysis of Hsc70, CD11a, CD11b, CD18 and Rap1 was performed (H, n = 3). Neutrophil adhesion  
775 was detected by a fluorescence microplate reader (I, n = 8). **Data represent the mean ± s.e.m. (\* P < 0.05 and \*\* P <**  
776 **0.01 versus the control group, ## p < 0.01 versus the PA-treated group; Significance calculated using two-way**  
777 **ANOVA).**

778

779

780

781

782

783

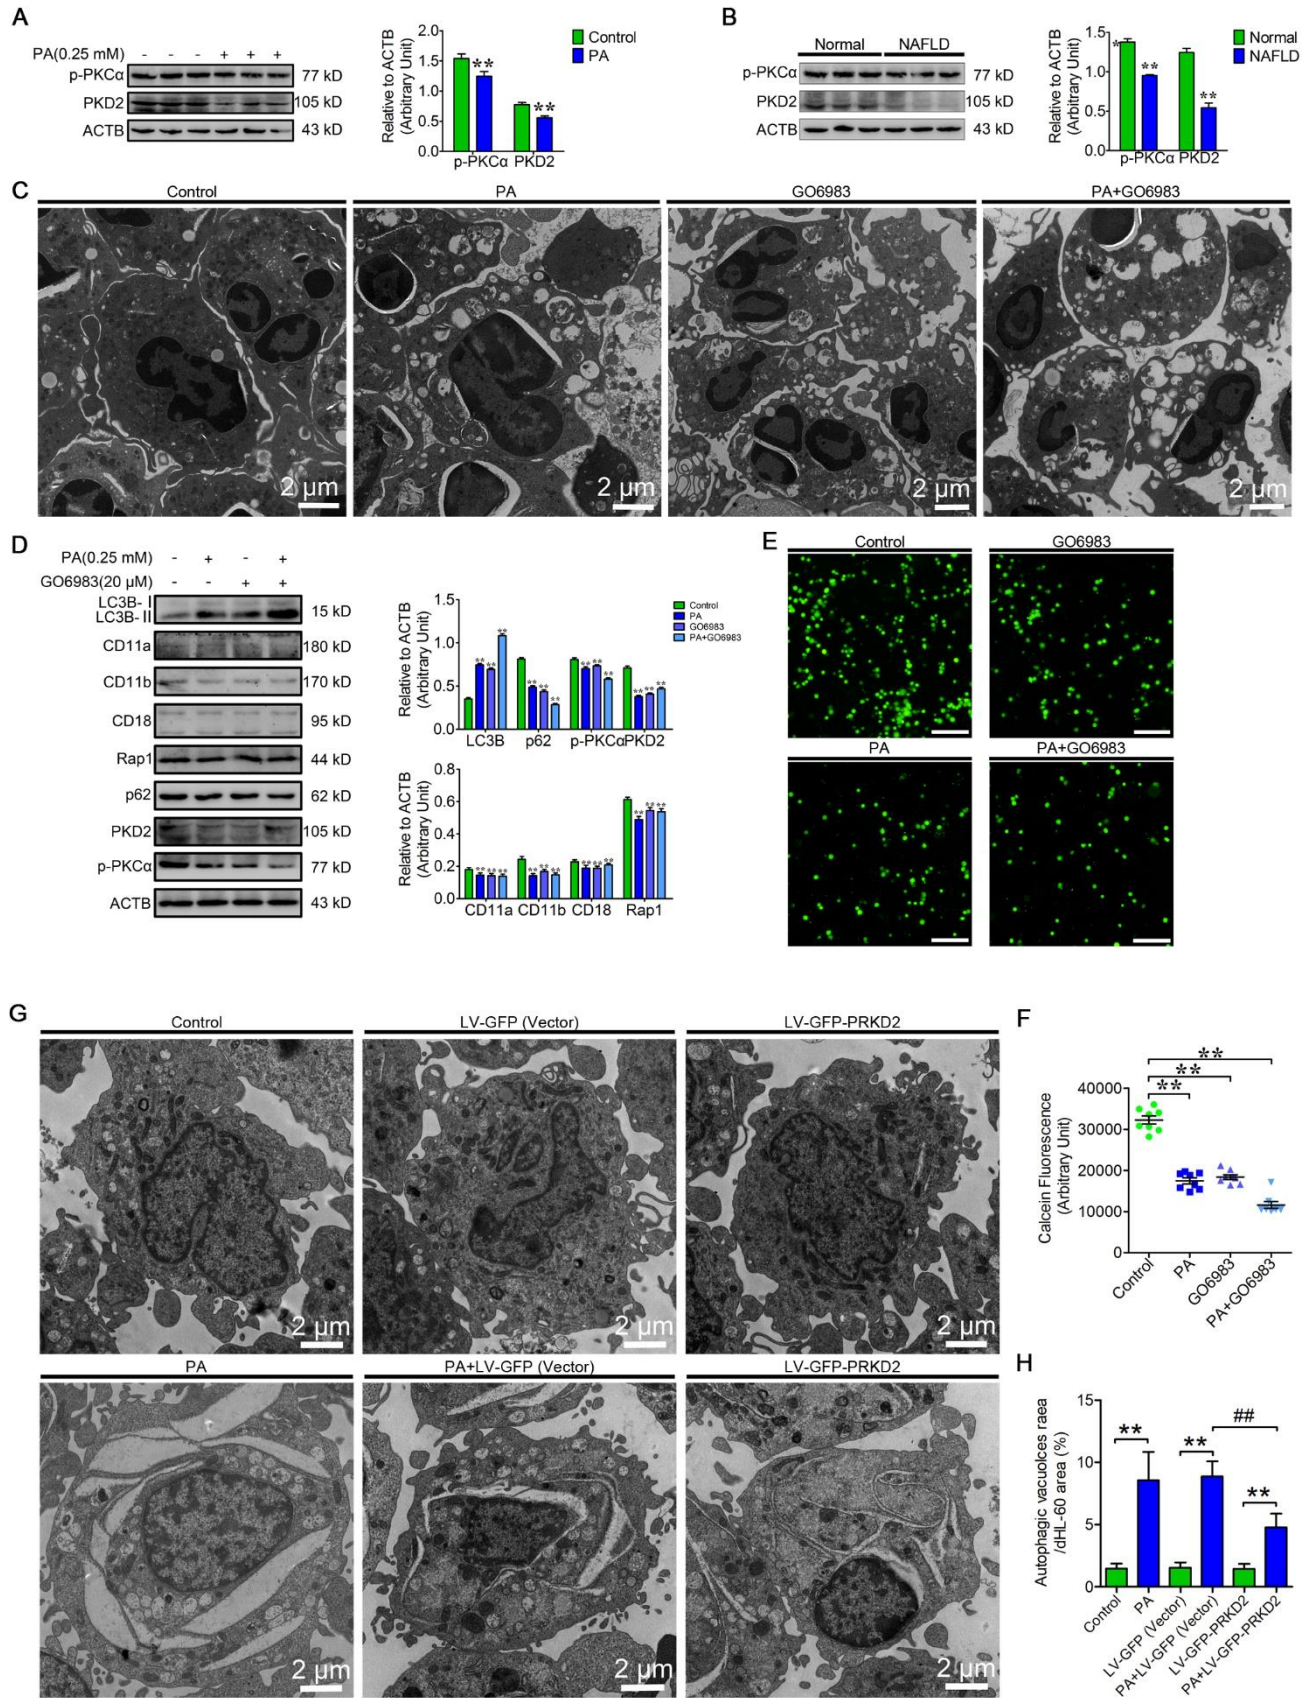

784

785

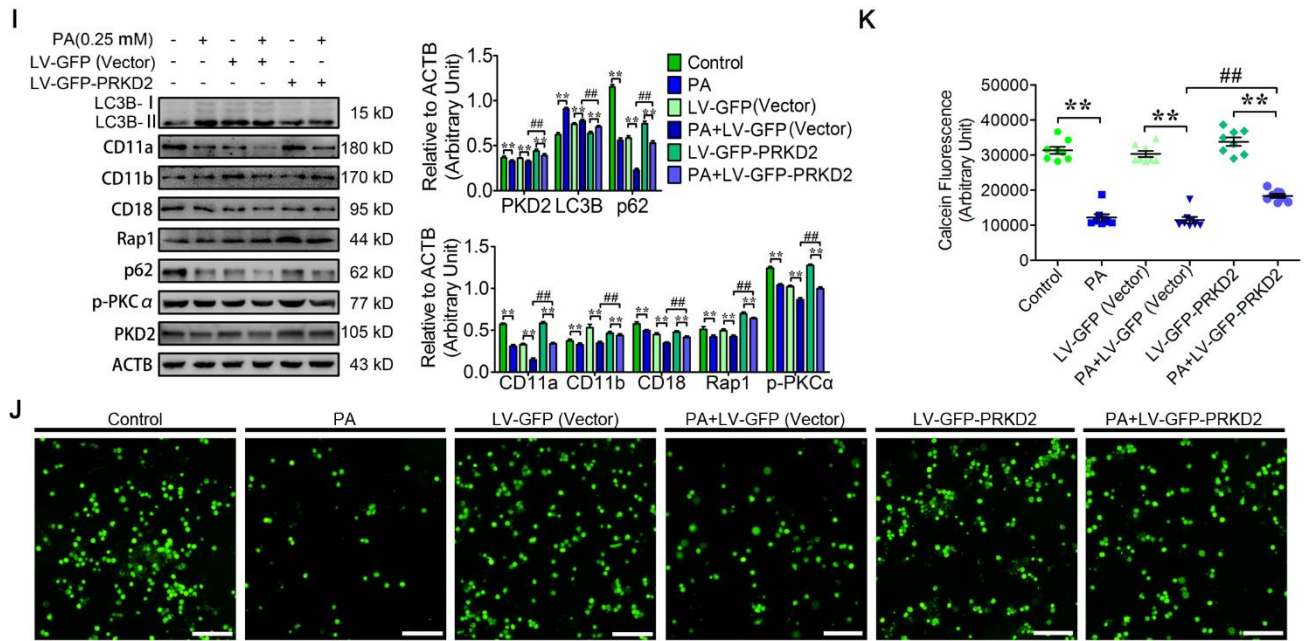

786

787 **Figure 5. PA Induced Autophagy via the p-PKC $\alpha$ /PKD2 Pathway and Further Decreased Neutrophil**  
 788 **Adhesion**

789 (A) Immunoblot for p-PKC $\alpha$  and PKD2 in control and PA-treated neutrophils (n = 3). **Data represent the mean  $\pm$**   
 790 **s.e.m. (\*\* P < 0.01 versus the control group; Significance calculated using two-way ANOVA).**

791 (B) Immunoblot for p-PKC $\alpha$  and PKD2 in normal and NAFLD neutrophils (n = 3). **Data represent the mean  $\pm$**   
 792 **s.e.m. (\*\* P < 0.01 versus the control group; Significance calculated using two-way ANOVA).**

793 (C-F) The p-PKC $\alpha$ /PKD2 pathway is involved in the regulation of neutrophil autophagy and adhesion. Neutrophils  
 794 were treated by PA, PKC $\alpha$ /PKD2 inhibitor GO6983 (10  $\mu$ M). (C) **Representative transmission electron micrographs**  
 795 **of neutrophils treated by PA, GO6983.** (D) Immunoblotting for p-PKC $\alpha$ , PKD2, LC3B, p62, CD11a, CD11b, CD18  
 796 and Rap1 was performed **in PA or GO6983 treated neutrophils** (n = 3). **Data represent the mean  $\pm$  s.e.m. (\*\* P <**  
 797 **0.01 versus the control group, Significance calculated using two-way ANOVA).** (E) Representative fluorescence  
 798 micrographs of the corresponding treatments of neutrophils adhered to HUVECs. Scale bar, 400  $\mu$ m. (F) Neutrophil  
 799 adhesion was detected using a fluorescence microplate reader (n = 8). **Data represent the mean  $\pm$  s.e.m. (\*\* P < 0.01**  
 800 **versus the control group; Significance calculated using one-way ANOVA).**

801 (G-K) PKD2 overexpression attenuated PA-induced autophagy and increased the adhesion of HL-60 cells. The cells  
 802 were infected or not infected with LV-GFP-PRKD2 and LV-GFP (Vector) and then to induce autophagy with PA.  
 803 (G) **Representative transmission electron micrographs of different groups dHL-60 cells.** (H) the area ratio of  
 804 autophagic vacuoles to dHL-60 cells were determined (n = 6). **Data represent the mean  $\pm$  s.e.m. (\*\* P < 0.01 versus**  
 805 **the control group, ## p < 0.01 versus the PA-treated group; Significance calculated using two-way ANOVA).** (I)

806 Immunoblot for LC3B, p62, p-PKC $\alpha$ , PKD2, CD11a, CD11b, CD18 and Rap1 (n = 3) were performed in HL-60  
807 cells. (J) Representative fluorescence micrographs of the corresponding treatments of HL-60 cells adhered to  
808 HUVECs. Scale bar, 400  $\mu$ m. (K) Fluorescence microplate analysis of HL-60 adhesion was detected by a  
809 fluorescence microplate reader (n = 8). **Data represent the mean  $\pm$  s.e.m. (\*\* P < 0.01 versus the control group, ## p  
810 < 0.01 versus the PA-treated group; Significance calculated using two-way ANOVA).**

811

812

813

814

815

816

817

818

819

820

821

822

823

824

825

826

827

828

829

830

831

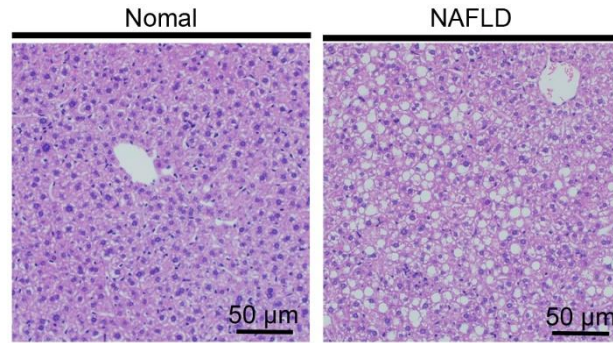

832

833 **Figure S1.** Representative images of HE-stained liver sections from normal individuals and NAFLD patients. Scale

834 bars as indicated.

835

836

837

838

839

840

841

842

843

844

845

846

847

848

849

850

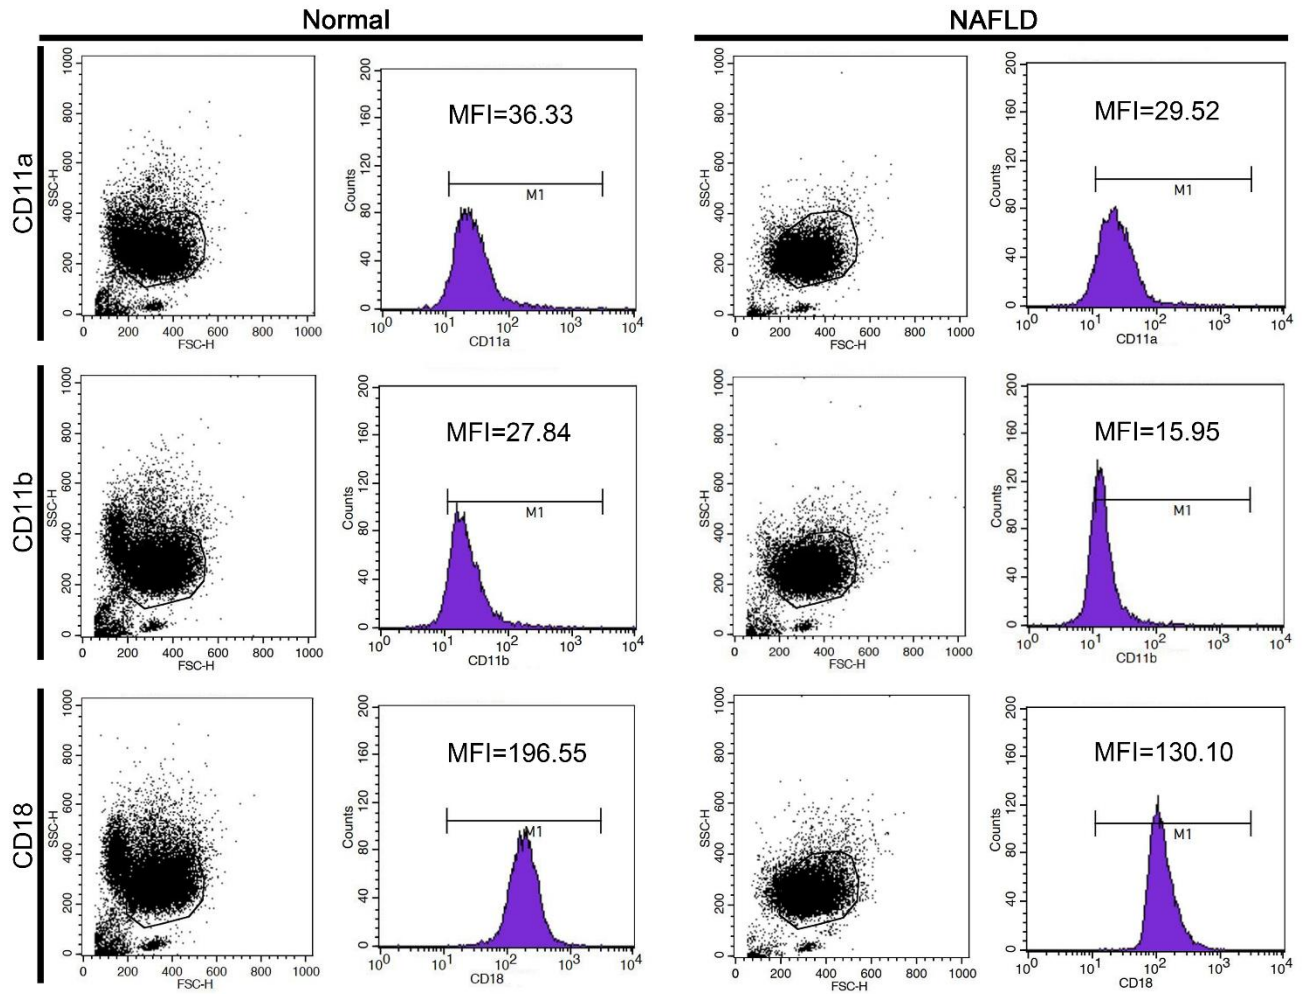

851

852

853 **Figure S2.** Flow cytometry images of the surface expression of CD11a, CD11b and CD18 on normal and NAFLD  
854 neutrophils.

855

856

857

858

859

860

861

862

863

864

865

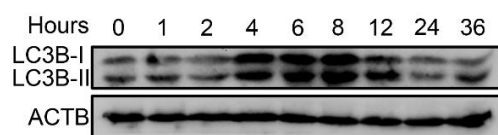

866

867 **Figure S3.** Immunoblot for the lipidation of LC3B in PA (0.25 mM)-treated neutrophils.

868

869

870

871

872

873

874

875

876

877

878

879

880

881

882

883

884

885

886

887

888

889

890

891

892

893

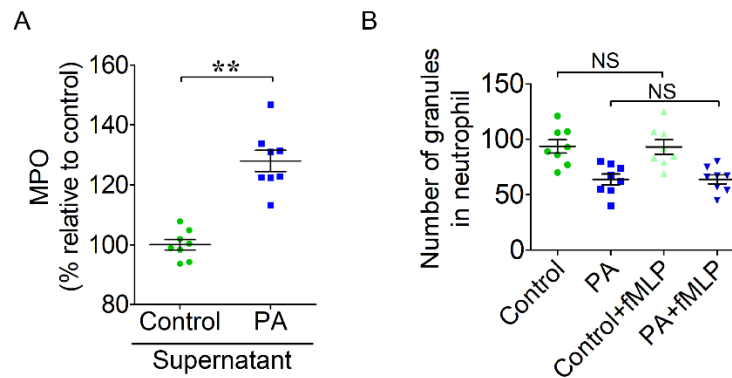

894

895 **Figure S4.** (A) ELISA results of MPO in PA-treated neutrophil supernatant. The supernatant of control and PA-  
896 treated neutrophils was collected, the content of MPO was detected with the ELISA kit. Data represent the mean  $\pm$   
897 s.e.m. (\*\* P < 0.01 versus the control group; Significance calculated using t test).

898 (B) The number of granules in normal and PA-treated neutrophils with or without using fMLP to induce  
899 degranulation. Control and PA-treated neutrophils were cultured for 6h and then stimulated with 1  $\mu$ M fMLP for 30  
900 min to induce degranulation and then were collected to perform the granule quantification, without fMLP treatment  
901 groups as control. Data represent the mean  $\pm$  s.e.m. (NS means no different versus the not stimulated groups;  
902 Significance calculated using one-way ANOVA).

903

904

905

906

907

908



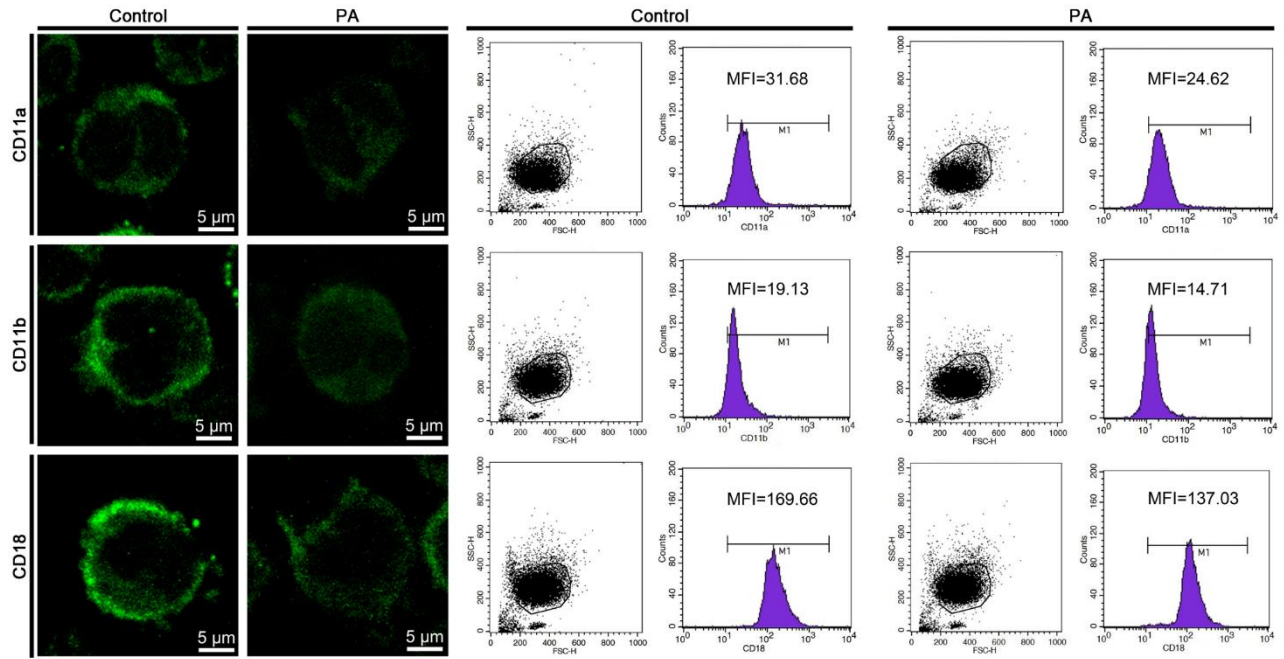

909

910 **Figure S5.** Representative immunofluorescence images (left) and flow cytometry images (right) of the surface  
911 expression of CD11a, CD11b and CD18 on control and PA-treated neutrophils. Scale bars as indicated.

912

913

914

915

916

917

918

919

920

921

922

923

924

925

926

927

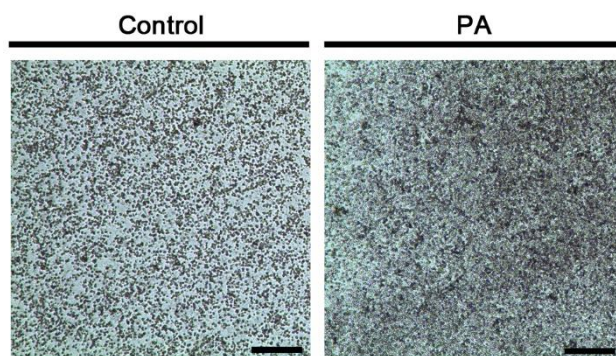

928

929 **Figure S6.** Representative light microscopy images of control and PA-treated neutrophils. Scale bar, 2 mm.

930

931

932

933

934

935

936

937

938

939

940

941

942

943

944

945

946

947

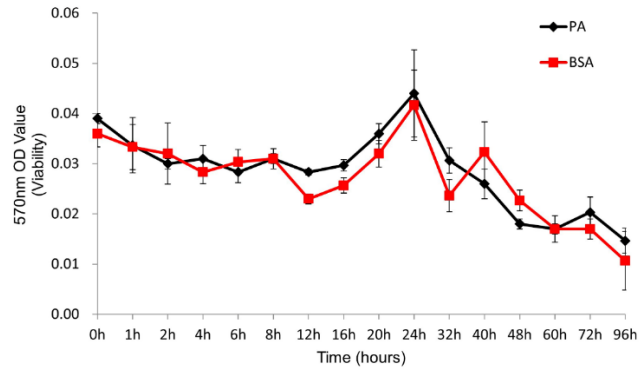

948

949 **Figure S7.** The viability of BSA control and PA (0.25 mM)-treated neutrophils was assessed using the CCK-8  
950 cytotoxicity assay.

951

952

953

954

955

956

957

958

959

960

961

962

963

964

965

966

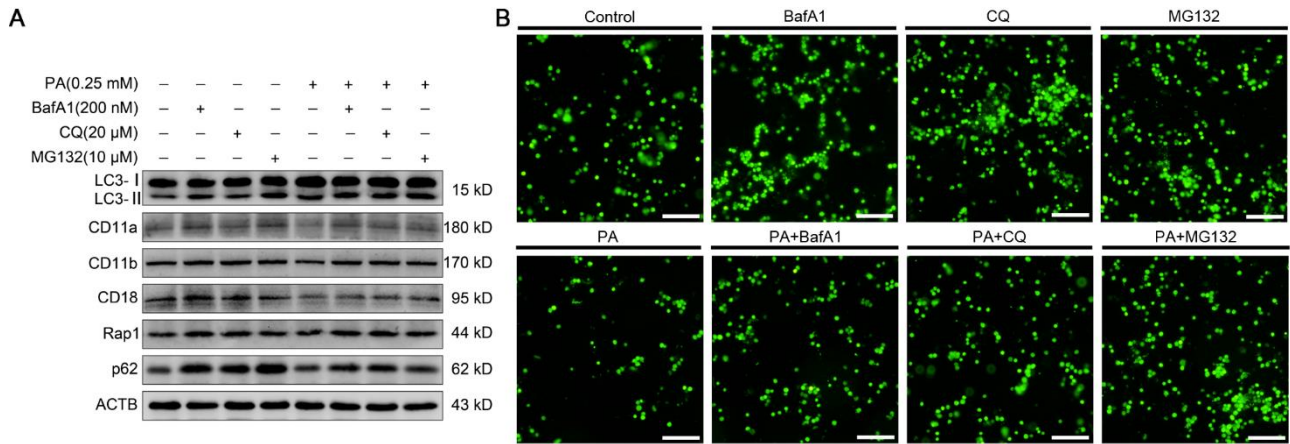

967

968 **Figure S8.** (A) Immunoblot for LC3B, p62, CD11a, CD11b, CD18 and Rap1 (A) in control and PA-treated

969 neutrophils (treated or not treated with BafA1, CQ or MG132). (B) Representative fluorescence micrographs of

970 control and PA-treated neutrophils (treated or not treated with BafA1, CQ or MG132) adhered to HUVECs. Scale

971 bar, 400  $\mu$ m.

972

973

974

975

976

977

978

979

980

981

982

983

984

985

986

987

988

989

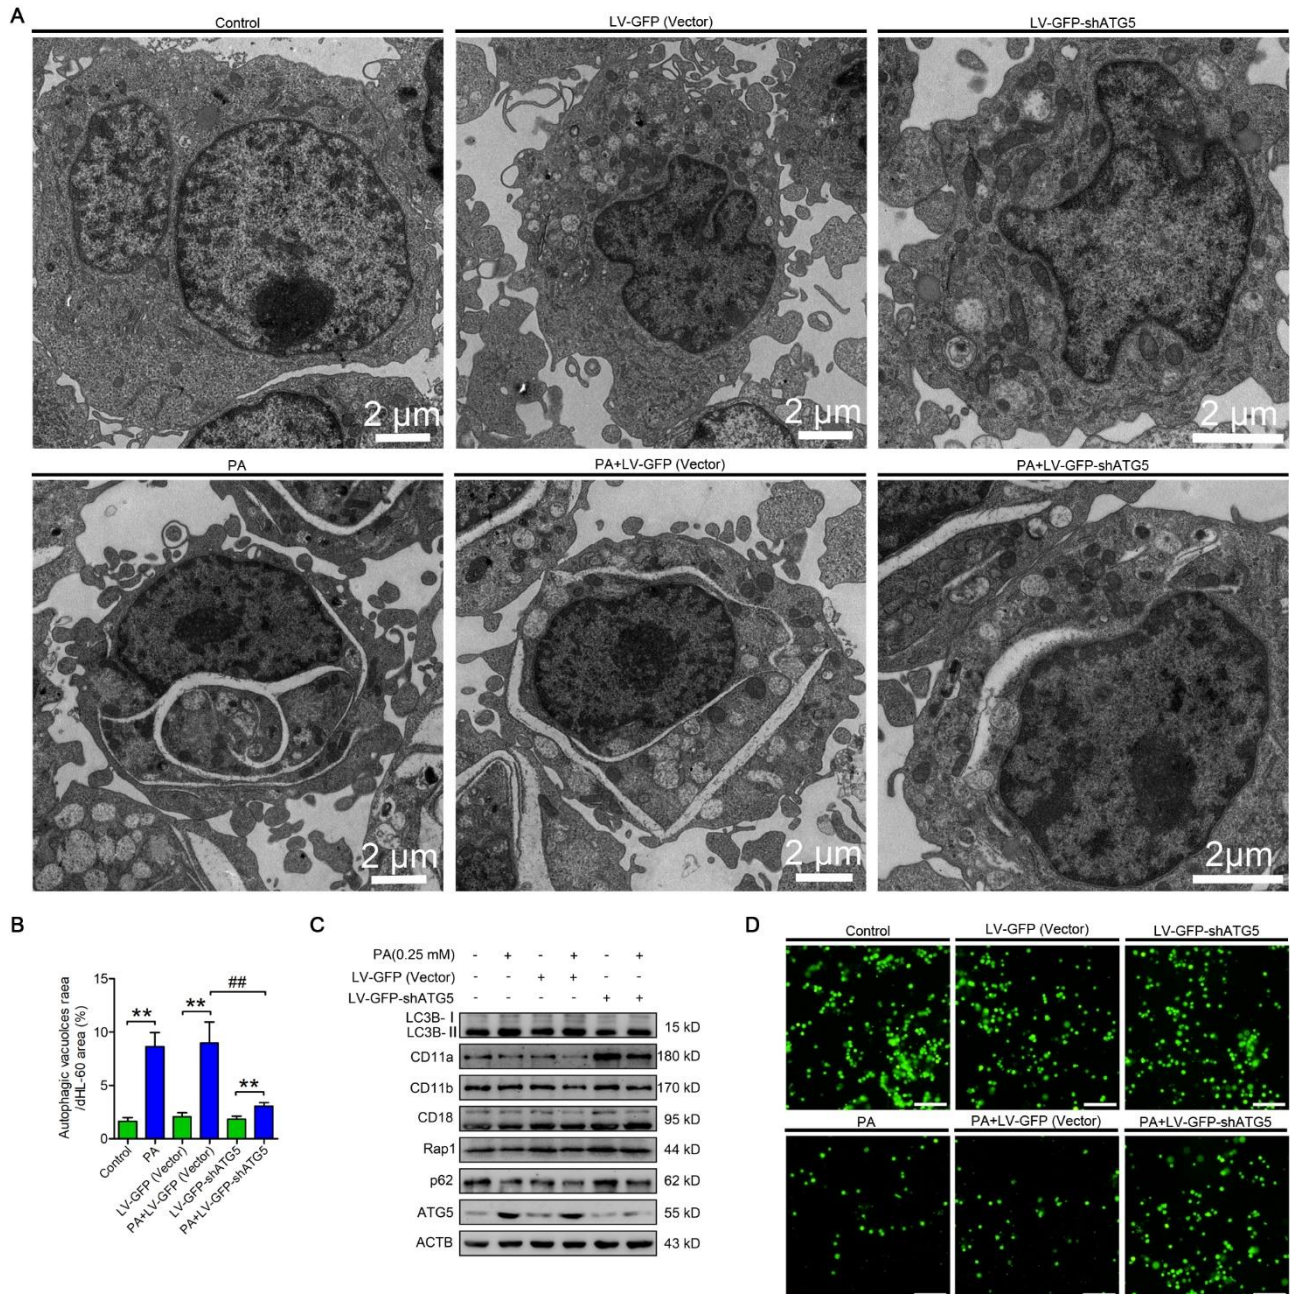

990

991 **Figure S9.** (A) Representative transmission electron micrographs of control and PA-treated HL-60 cells (infected  
 992 or not infected with LV-GFP-shATG5 or empty lentivectors). Scale bars as indicated. (B) the area ratio of  
 993 autophagic vacuoles to dHL-60 cells were determined (n = 6). Data represent the mean ± s.e.m. (\*\* P < 0.01 versus  
 994 the control group, ## p < 0.01 versus the PA-treated group; Significance calculated using two-way ANOVA). (C)  
 995 Immunoblot for LC3B, p62, ATG5, CD11a, CD11b, CD18 and Rap1 in control and PA-treated HL-60 cells  
 996 (infected or not infected with LV-GFP-shATG5 or empty lentivectors). (D) Representative fluorescence  
 997 micrographs of control and PA-treated differentiated HL-60 cells (infected or not infected with LV-GFP-shATG5 or  
 998 empty lentivectors) adhered to HUVECs. Scale bar, 400 μm.

999

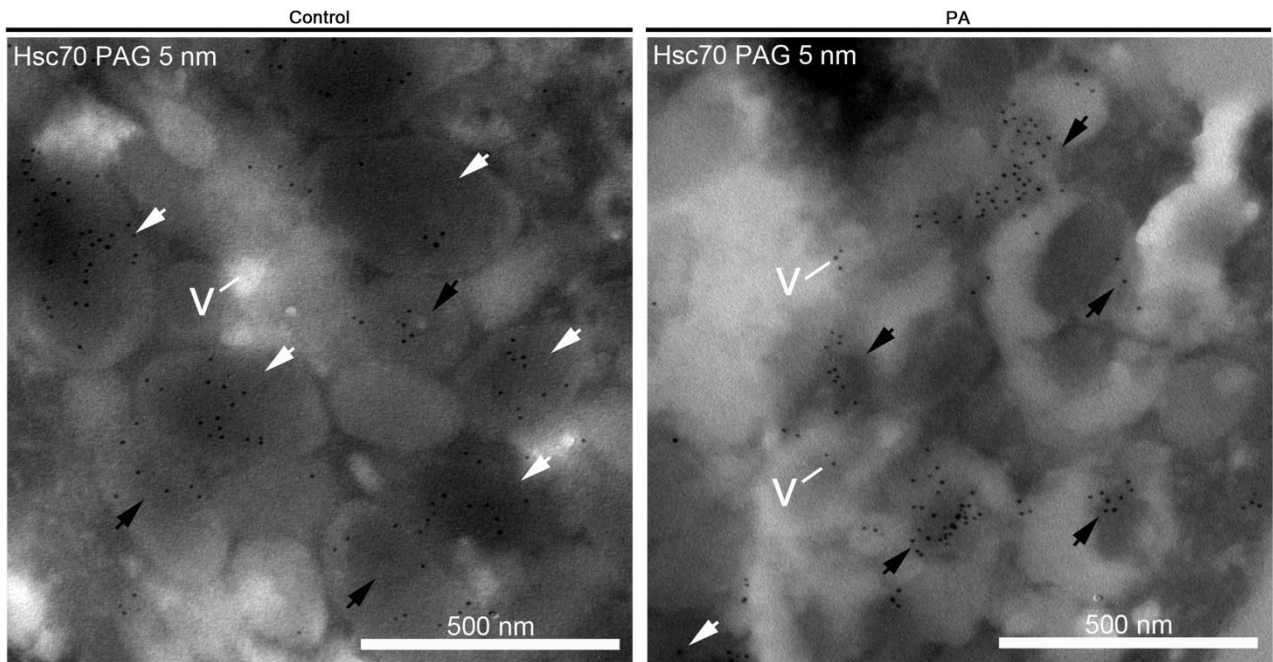

1000

1001 **Figure S10.** Immunogold electron micrographs showing the localization of Hsc70 in control and PA-treated

1002 neutrophils. White arrows, granules. Black arrows, AVi and AVd. v, vacuoles. Scale bars as indicated.

1003

1004

1005

1006

1007

1008

1009

1010

1011

1012

1013

1014

1015

1016

1017

1018

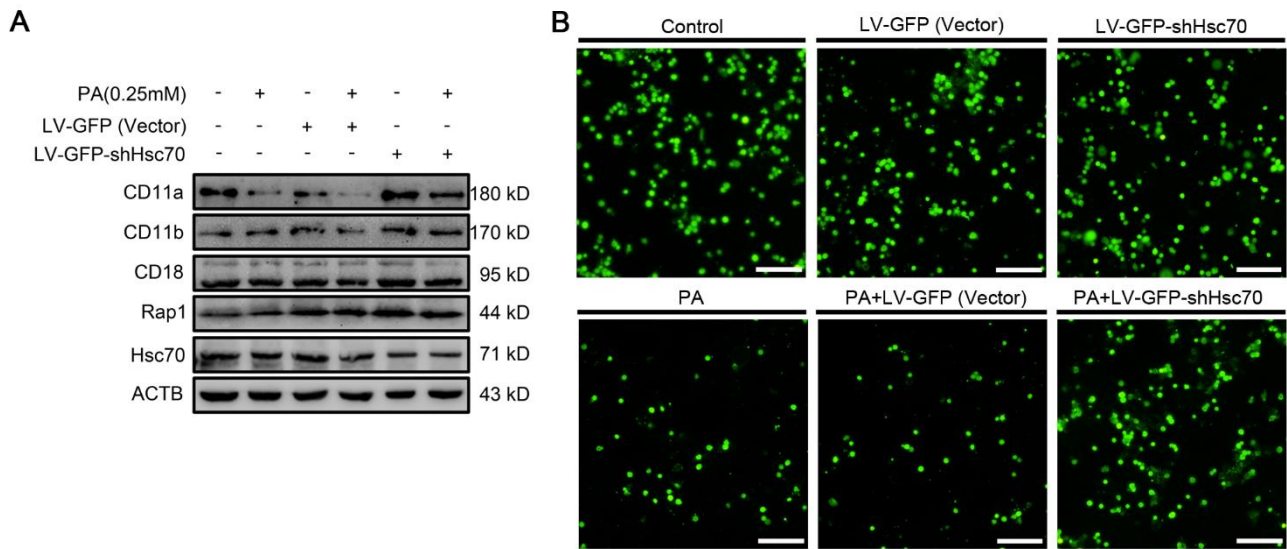

1019

1020 **Figure S11.** (A) Immunoblotting for Hsc70, CD11a, CD11b, CD18 and Rap1 was performed in control and PA-  
1021 treated HL-60 cells (infected or not infected with LV-GFP-shHsc70 or empty lentivectors). (B) Representative  
1022 fluorescence micrographs of control and PA-treated HL-60 cells (infected or not infected with LV-GFP-shHsc70 or  
1023 empty lentivectors) adhered to HUVECs. Scale bar, 400 μm.

1024

1025

1026

1027

1028

1029

1030

1031

1032

1033

1034

1035

1036

1037

1038

1039 **Table S1.** The list of proteins interacting with CD11a identified by the shotgun

1040 **Table S2.** The list of proteins interacting with CD11b identified by the shotgun

1041 **Table S3.** The list of proteins interacting with CD18 identified by the shotgun

1042 **Table S4.** The list of proteins interacting with Rap1 identified by the shotgun

1043 **Table S5.** The list of common proteins interacting with CD11a, CD11b, CD18 and Rap1 identified by the shotgun

1044 **Table S6.** The list of differentially expressed proteins between PA treatment group and control group by iTRAQ

1045 **Table S7.** The list of proteins interacting with Hsc70 identified by the shotgun

1046

1047
